# Supplementary material
Source: PubMed Central journal article supplement (PMC2705903)
Supplement: NIHMS26278-supplement-01.pdf [file NIHMS26278-supplement-01.pdf]

| Poxvirus                  | start  | finish | score    | orientation | sequence       |
|---------------------------|--------|--------|----------|-------------|----------------|
| AMEV-EPB_forward_1-232392 | 24065  | 24077  | 0.887017 | -           | GATGATCCTTGGA  |
| AMEV-EPB_forward_1-232392 | 27483  | 27495  | 0.852412 | -           | TTTAATCCTTATT  |
| AMEV-EPB_forward_1-232392 | 48727  | 48739  | 0.857229 | +           | TTTTGTCCTTGTA  |
| AMEV-EPB_forward_1-232392 | 58197  | 58209  | 0.884469 | -           | GATAATCCTTGGT  |
| AMEV-EPB_forward_1-232392 | 65405  | 65417  | 0.886527 | -           | AGAAGTCCTTATT  |
| AMEV-EPB_forward_1-232392 | 72982  | 72994  | 0.853825 | +           | TTTGATCCTTATC  |
| AMEV-EPB_forward_1-232392 | 80316  | 80328  | 0.851322 | -           | TTTAATCCTTATA  |
| AMEV-EPB_forward_1-232392 | 89916  | 89928  | 0.862614 | -           | TGTGGTCCTTACA  |
| AMEV-EPB_forward_1-232392 | 90323  | 90335  | 0.896382 | +           | TTATACCCTTGTT  |
| AMEV-EPB_forward_1-232392 | 92221  | 92233  | 0.850424 | +           | CTTTATCCTTCGA  |
| AMEV-EPB_forward_1-232392 | 92509  | 92521  | 0.895353 | +           | TGTTATCCTTGTT  |
| AMEV-EPB_forward_1-232392 | 100383 | 100395 | 0.882124 | +           | GGCGATCCTTCGT  |
| AMEV-EPB_forward_1-232392 | 102474 | 102486 | 0.852582 | +           | TAAAGCTCTTAGA  |
| AMEV-EPB_forward_1-232392 | 111833 | 111845 | 0.880903 | -           | TTTTACCCTTATT  |
| AMEV-EPB_forward_1-232392 | 121951 | 121963 | 0.908634 | +           | TAATGCCCTTGTA  |
| AMEV-EPB_forward_1-232392 | 123671 | 123683 | 0.857298 | +           | TCAGACCCTTCAT  |
| AMEV-EPB_forward_1-232392 | 131312 | 131324 | 0.866998 | -           | TGTAACTCCTTGTT |
| AMEV-EPB_forward_1-232392 | 132898 | 132910 | 0.852272 | +           | ATAGATCCTTGTT  |
| AMEV-EPB_forward_1-232392 | 133996 | 134008 | 0.859902 | +           | TAACATCCTTGTC  |
| AMEV-EPB_forward_1-232392 | 134638 | 134650 | 0.862454 | -           | TGATTCCTTGAT   |
| AMEV-EPB_forward_1-232392 | 148111 | 148123 | 0.856009 | -           | CATTGTCCTTGAA  |
| AMEV-EPB_forward_1-232392 | 153646 | 153658 | 0.884732 | -           | AATAATCCTTGGT  |
| AMEV-EPB_forward_1-232392 | 159732 | 159744 | 0.875096 | +           | TATGATCCTTGTA  |
| AMEV-EPB_forward_1-232392 | 160745 | 160757 | 0.8724   | -           | TTTCATCCTTAGT  |
| AMEV-EPB_forward_1-232392 | 164739 | 164751 | 0.883713 | -           | ATAGATCCTTGGT  |
| AMEV-EPB_forward_1-232392 | 192780 | 192792 | 0.855875 | -           | TATAATCCTTATC  |
| AMEV-EPB_forward_1-232392 | 193200 | 193212 | 0.852202 | +           | AATAATCCTTGTA  |
| AMEV-EPB_forward_1-232392 | 195835 | 195847 | 0.852612 | +           | AGTCATCCTTCTA  |
| AMEV-EPB_forward_1-232392 | 197601 | 197613 | 0.907604 | -           | TATTGCCCTTGTA  |
| AMEV-EPB_forward_1-232392 | 199438 | 199450 | 0.851809 | -           | TATTATCCTTGAA  |
| AMEV-EPB_forward_1-232392 | 206452 | 206464 | 0.897224 | -           | TGAGATCCTTAAA  |
| CMLV-M96_forward_1-205719 | 5223   | 5235   | 0.868214 | +           | TGGTGCCTTCTT   |
| CMLV-M96_forward_1-205719 | 5818   | 5830   | 0.895353 | +           | TGTATCCTTGTT   |
| CMLV-M96_forward_1-205719 | 7710   | 7722   | 0.88679  | +           | TTACATCCTTGGA  |
| CMLV-M96_forward_1-205719 | 8129   | 8141   | 0.851643 | +           | GTTAATCCTTCGT  |
| CMLV-M96_forward_1-205719 | 8840   | 8852   | 0.851252 | +           | AGAGACCCTGCGC  |
| CMLV-M96_forward_1-205719 | 8931   | 8943   | 0.909021 | +           | GGGAGTCCTTAGT  |
| CMLV-M96_forward_1-205719 | 9101   | 9113   | 0.866177 | +           | TCTCGTCCTTGGT  |
| CMLV-M96_forward_1-205719 | 9377   | 9389   | 0.958786 | -           | TGGGGCCCTTGTA  |
| CMLV-M96_forward_1-205719 | 9735   | 9747   | 0.894731 | +           | GGACTCCCTTGTA  |
| CMLV-M96_forward_1-205719 | 10395  | 10407  | 0.888397 | -           | CGTTCTCCTTGGT  |
| CMLV-M96_forward_1-205719 | 11054  | 11066  | 0.852076 | +           | TATCGTCCTTATC  |
| CMLV-M96_forward_1-205719 | 13509  | 13521  | 0.89274  | -           | GGGTACCCTTAAC  |
| CMLV-M96_forward_1-205719 | 13715  | 13727  | 0.884558 | +           | TGTCATCCTTATA  |
| CMLV-M96_forward_1-205719 | 15269  | 15281  | 0.850639 | -           | TAAAGTCCTTCAT  |
| CMLV-M96_forward_1-205719 | 15311  | 15323  | 0.863233 | -           | TGAAACCGTTCGT  |
| CMLV-M96_forward_1-205719 | 18145  | 18157  | 0.859725 | -           | TGATACCGTTAGT  |
| CMLV-M96_forward_1-205719 | 24278  | 24290  | 0.874372 | +           | TAATATCCTTAGT  |
| CMLV-M96_forward_1-205719 | 27878  | 27890  | 0.917183 | +           | TGAGTTCCTTGGT  |
| CMLV-M96_forward_1-205719 | 28400  | 28412  | 0.907342 | +           | TGTTTTCCCTTGTC |
| CMLV-M96_forward_1-205719 | 32763  | 32775  | 0.854834 | -           | TGGTCTCCTTCGC  |
| CMLV-M96_forward_1-205719 | 33910  | 33922  | 0.877346 | +           | CCAAACCCTTGAT  |
| CMLV-M96_forward_1-205719 | 38857  | 38869  | 0.856553 | -           | TTAAGTCCTTAAA  |
| CMLV-M96_forward_1-205719 | 40807  | 40819  | 0.861115 | +           | TGATAACCTTGGC  |
| CMLV-M96_forward_1-205719 | 41014  | 41026  | 0.881163 | +           | TGGTGCCTTGTG   |
| CMLV-M96_forward_1-205719 | 42562  | 42574  | 0.896584 | -           | TGACATCCTTGAA  |
| CMLV-M96_forward_1-205719 | 51702  | 51714  | 0.864926 | -           | AGAATTCCTTCGC  |

|                           |        |        |          |   |                |
|---------------------------|--------|--------|----------|---|----------------|
| CMLV-M96_forward_1-205719 | 51728  | 51740  | 0.875482 | + | TAGTACCCTTAAT  |
| CMLV-M96_forward_1-205719 | 53421  | 53433  | 0.854173 | - | ATACATCCTTAGT  |
| CMLV-M96_forward_1-205719 | 54513  | 54525  | 0.860948 | - | TGTATTCCTTAAC  |
| CMLV-M96_forward_1-205719 | 54550  | 54562  | 0.852046 | + | CGGATCCCATGGT  |
| CMLV-M96_forward_1-205719 | 55375  | 55387  | 0.881086 | - | TGTCACCCATGGA  |
| CMLV-M96_forward_1-205719 | 57463  | 57475  | 0.86392  | + | TGCAACTCTTAGC  |
| CMLV-M96_forward_1-205719 | 58009  | 58021  | 0.884823 | + | ATGGACCCTTGAT  |
| CMLV-M96_forward_1-205719 | 58183  | 58195  | 0.857009 | + | TATAATCCTTATA  |
| CMLV-M96_forward_1-205719 | 59980  | 59992  | 0.863966 | - | ACGAGCCCTTGTT  |
| CMLV-M96_forward_1-205719 | 63029  | 63041  | 0.850674 | + | TATTATCCTTGAC  |
| CMLV-M96_forward_1-205719 | 63417  | 63429  | 0.867965 | - | AGGAATCCTTATC  |
| CMLV-M96_forward_1-205719 | 64310  | 64322  | 0.852677 | + | TGCGTTCCTTG TG |
| CMLV-M96_forward_1-205719 | 66049  | 66061  | 0.863828 | + | CGTCATCCTTCAC  |
| CMLV-M96_forward_1-205719 | 66942  | 66954  | 0.872425 | + | TATATTCCTTGGA  |
| CMLV-M96_forward_1-205719 | 67889  | 67901  | 0.851371 | - | TAAAACCGTTGGT  |
| CMLV-M96_forward_1-205719 | 68740  | 68752  | 0.870829 | + | TGAAACTCTTAGG  |
| CMLV-M96_forward_1-205719 | 69177  | 69189  | 0.853403 | - | TAAACTCCTTAGC  |
| CMLV-M96_forward_1-205719 | 72344  | 72356  | 0.867733 | + | CGTATTCCTTCGG  |
| CMLV-M96_forward_1-205719 | 72629  | 72641  | 0.851704 | - | TAATATCCTTGAC  |
| CMLV-M96_forward_1-205719 | 74294  | 74306  | 0.863431 | - | TGTATTCCTTGAG  |
| CMLV-M96_forward_1-205719 | 74651  | 74663  | 0.878986 | - | ATAAACCCCTTGGA |
| CMLV-M96_forward_1-205719 | 75213  | 75225  | 0.871914 | - | TTCTGTCCCTGGT  |
| CMLV-M96_forward_1-205719 | 82246  | 82258  | 0.864609 | + | TGAAGCCATTGAA  |
| CMLV-M96_forward_1-205719 | 82377  | 82389  | 0.850988 | - | GATGATCCTTGAC  |
| CMLV-M96_forward_1-205719 | 84716  | 84728  | 0.858522 | - | AAAAGTCCTTGAT  |
| CMLV-M96_forward_1-205719 | 88331  | 88343  | 0.875294 | - | CTGGATCCTTAGA  |
| CMLV-M96_forward_1-205719 | 89486  | 89498  | 0.87468  | - | TCTTGCCCTTGTT  |
| CMLV-M96_forward_1-205719 | 91953  | 91965  | 0.868006 | + | CATAATCCTTGTA  |
| CMLV-M96_forward_1-205719 | 92019  | 92031  | 0.866737 | + | CGTTGTCCTTCAC  |
| CMLV-M96_forward_1-205719 | 92674  | 92686  | 0.858244 | + | TGGAGCCATTGTC  |
| CMLV-M96_forward_1-205719 | 92732  | 92744  | 0.858239 | + | GGAAGCTCTTCGC  |
| CMLV-M96_forward_1-205719 | 96003  | 96015  | 0.893243 | - | GGAGATCCTTGAT  |
| CMLV-M96_forward_1-205719 | 100310 | 100322 | 0.883156 | - | CGGTATCCTTGTA  |
| CMLV-M96_forward_1-205719 | 101090 | 101102 | 0.87568  | - | ATAAACCCCTTGAG |
| CMLV-M96_forward_1-205719 | 102219 | 102231 | 0.886872 | + | AAGAACCCTTGAT  |
| CMLV-M96_forward_1-205719 | 106021 | 106033 | 0.86912  | + | TTATTCCTTCGA   |
| CMLV-M96_forward_1-205719 | 106768 | 106780 | 0.882487 | - | TGAAGCCGTTAGA  |
| CMLV-M96_forward_1-205719 | 108118 | 108130 | 0.868075 | - | TTAGATCCTTGAT  |
| CMLV-M96_forward_1-205719 | 108488 | 108500 | 0.860015 | - | GGAAAACCTTGGT  |
| CMLV-M96_forward_1-205719 | 109836 | 109848 | 0.859005 | + | TACAACTCCTCGT  |
| CMLV-M96_forward_1-205719 | 109881 | 109893 | 0.888047 | - | GAAGATCCTTGGA  |
| CMLV-M96_forward_1-205719 | 111123 | 111135 | 0.8697   | + | CTTACCCCTTGAT  |
| CMLV-M96_forward_1-205719 | 111454 | 111466 | 0.859    | + | CTATTCCTTGAT   |
| CMLV-M96_forward_1-205719 | 112013 | 112025 | 0.866287 | + | AGTCGCCGTTGGT  |
| CMLV-M96_forward_1-205719 | 112159 | 112171 | 0.871484 | - | CGTGACTCCTCGT  |
| CMLV-M96_forward_1-205719 | 112901 | 112913 | 0.862557 | - | TGTTGCCTTAGT   |
| CMLV-M96_forward_1-205719 | 113007 | 113019 | 0.879943 | + | CACCACCCTTGAA  |
| CMLV-M96_forward_1-205719 | 113700 | 113712 | 0.886242 | - | CGGAACTCCTGGA  |
| CMLV-M96_forward_1-205719 | 114866 | 114878 | 0.868476 | + | AAATATCCTTGGA  |
| CMLV-M96_forward_1-205719 | 116292 | 116304 | 0.884124 | + | TGAGATCCTTAAG  |
| CMLV-M96_forward_1-205719 | 116299 | 116311 | 0.896435 | - | TATGGCCCTTAAG  |
| CMLV-M96_forward_1-205719 | 116431 | 116443 | 0.888253 | + | TGTAACCGTTGGA  |
| CMLV-M96_forward_1-205719 | 118576 | 118588 | 0.862553 | - | CGTACCATTAGT   |
| CMLV-M96_forward_1-205719 | 119444 | 119456 | 0.925763 | - | TGTATCCCTTGTT  |
| CMLV-M96_forward_1-205719 | 119951 | 119963 | 0.871855 | + | TATCTCCCTTGAT  |
| CMLV-M96_forward_1-205719 | 120469 | 120481 | 0.85808  | - | TCAATCCCTTCGT  |
| CMLV-M96_forward_1-205719 | 120539 | 120551 | 0.850846 | + | TATCGTCCTTAAT  |
| CMLV-M96_forward_1-205719 | 120965 | 120977 | 0.873544 | - | CATCATCCTTAGA  |

|                           |        |        |          |   |                |
|---------------------------|--------|--------|----------|---|----------------|
| CMLV-M96_forward_1-205719 | 122080 | 122092 | 0.878233 | + | TGGCGCCATTGGC  |
| CMLV-M96_forward_1-205719 | 123158 | 123170 | 0.862985 | + | AGTTACTCTTGGT  |
| CMLV-M96_forward_1-205719 | 123748 | 123760 | 0.854791 | + | TTTGTTCCCTTAGC |
| CMLV-M96_forward_1-205719 | 125261 | 125273 | 0.857049 | + | CACCATCCTTGGG  |
| CMLV-M96_forward_1-205719 | 126118 | 126130 | 0.858348 | + | TAGAGCTCTTGGA  |
| CMLV-M96_forward_1-205719 | 129328 | 129340 | 0.871336 | - | AAAATCCCTTAGG  |
| CMLV-M96_forward_1-205719 | 132571 | 132583 | 0.870419 | - | AGTTATCCTTGAC  |
| CMLV-M96_forward_1-205719 | 133664 | 133676 | 0.860352 | - | TAGAATCCTTGAA  |
| CMLV-M96_forward_1-205719 | 137005 | 137017 | 0.855172 | - | TTTCTCCCTTATT  |
| CMLV-M96_forward_1-205719 | 137605 | 137617 | 0.851229 | + | AGACCTCCTTCGT  |
| CMLV-M96_forward_1-205719 | 139817 | 139829 | 0.853927 | - | CGCTATCCTTAAC  |
| CMLV-M96_forward_1-205719 | 143853 | 143865 | 0.909271 | - | AATGGCCCTTGTT  |
| CMLV-M96_forward_1-205719 | 143877 | 143889 | 0.867891 | + | TTAAATCCTTGTT  |
| CMLV-M96_forward_1-205719 | 144874 | 144886 | 0.853106 | + | TAACGTCCTTATC  |
| CMLV-M96_forward_1-205719 | 146970 | 146982 | 0.879814 | - | TTTTACCCTTATA  |
| CMLV-M96_forward_1-205719 | 148458 | 148470 | 0.868532 | - | TAGGACCCTTGCT  |
| CMLV-M96_forward_1-205719 | 149081 | 149093 | 0.869095 | - | TATAATCCTTGAT  |
| CMLV-M96_forward_1-205719 | 150324 | 150336 | 0.87285  | + | ATACGCCCTTATC  |
| CMLV-M96_forward_1-205719 | 153798 | 153810 | 0.868075 | + | CTAGATCCTTGTT  |
| CMLV-M96_forward_1-205719 | 153816 | 153828 | 0.878749 | - | TGAAACCATTGGG  |
| CMLV-M96_forward_1-205719 | 156081 | 156093 | 0.859378 | - | TAAAACCTTGGG   |
| CMLV-M96_forward_1-205719 | 157629 | 157641 | 0.860293 | - | GGTTATCCTTATA  |
| CMLV-M96_forward_1-205719 | 159218 | 159230 | 0.894686 | - | CAAAACCTTAAC   |
| CMLV-M96_forward_1-205719 | 159258 | 159270 | 0.907533 | - | TGGGATCCTTGTT  |
| CMLV-M96_forward_1-205719 | 162976 | 162988 | 0.860956 | + | TCTAGTCCTTAGC  |
| CMLV-M96_forward_1-205719 | 163491 | 163503 | 0.857051 | - | TGGGCTCCTTATA  |
| CMLV-M96_forward_1-205719 | 163557 | 163569 | 0.882105 | - | TTTTATCCTTGGT  |
| CMLV-M96_forward_1-205719 | 169239 | 169251 | 0.854731 | + | AGACATCCTTCTT  |
| CMLV-M96_forward_1-205719 | 171897 | 171909 | 0.867769 | + | TATATCCCTTAAA  |
| CMLV-M96_forward_1-205719 | 172346 | 172358 | 0.896682 | - | AGAAACCCTTCTG  |
| CMLV-M96_forward_1-205719 | 172432 | 172444 | 0.857519 | - | CATCTTCCTTGGA  |
| CMLV-M96_forward_1-205719 | 172453 | 172465 | 0.853776 | - | TTTTGTCCTTGAA  |
| CMLV-M96_forward_1-205719 | 173638 | 173650 | 0.850124 | + | TGGATCCGTTGGA  |
| CMLV-M96_forward_1-205719 | 174188 | 174200 | 0.854407 | - | TTAATTCCTTAGT  |
| CMLV-M96_forward_1-205719 | 174536 | 174548 | 0.860748 | - | CGAATTCCTTAAT  |
| CMLV-M96_forward_1-205719 | 175523 | 175535 | 0.920417 | + | TGAGGTCCTTGAT  |
| CMLV-M96_forward_1-205719 | 178202 | 178214 | 0.872214 | + | TGGAATCCTTCAA  |
| CMLV-M96_forward_1-205719 | 178527 | 178539 | 0.850532 | - | CGTATCCTTGGA   |
| CMLV-M96_forward_1-205719 | 179574 | 179586 | 0.856167 | + | TGATGCCATTCGA  |
| CMLV-M96_forward_1-205719 | 182473 | 182485 | 0.898929 | + | TAACGCCCTTATA  |
| CMLV-M96_forward_1-205719 | 183251 | 183263 | 0.890469 | - | CGATTCCTTATC   |
| CMLV-M96_forward_1-205719 | 185285 | 185297 | 0.874892 | - | TGTAACCGTTAGT  |
| CMLV-M96_forward_1-205719 | 186574 | 186586 | 0.908949 | - | TGCTATCCTTGGT  |
| CMLV-M96_forward_1-205719 | 190272 | 190284 | 0.872958 | - | TGTCATCCTTCTT  |
| CMLV-M96_forward_1-205719 | 191085 | 191097 | 0.859021 | - | TGTAGACCTTCGT  |
| CMLV-M96_forward_1-205719 | 193340 | 193352 | 0.864314 | - | CTAATTCCTTGGA  |
| CMLV-M96_forward_1-205719 | 194404 | 194416 | 0.859586 | + | TGTATCCCCTAGA  |
| CMLV-M96_forward_1-205719 | 195570 | 195582 | 0.86326  | - | TATGTCCCTTCTT  |
| CMLV-M96_forward_1-205719 | 195780 | 195792 | 0.867797 | - | TTAAACCCTTCAG  |
| CMLV-M96_forward_1-205719 | 197436 | 197448 | 0.85279  | + | TAATCTCCTTGGA  |
| CMLV-M96_forward_1-205719 | 197998 | 198010 | 0.88679  | - | TTACATCCTTGGA  |
| CMLV-M96_forward_1-205719 | 199890 | 199902 | 0.895353 | - | TGTTATCCTTGTT  |
| CMLV-M96_forward_1-205719 | 200485 | 200497 | 0.868214 | - | TGGTGTCTTCTT   |
| CPXV-BR_forward_1-224499  | 132    | 144    | 0.85651  | + | TGTAACCCATGAC  |
| CPXV-BR_forward_1-224499  | 218    | 230    | 0.860592 | + | TGAGACCATTGAA  |
| CPXV-BR_forward_1-224499  | 296    | 308    | 0.860592 | + | TGAGACCATTGAA  |
| CPXV-BR_forward_1-224499  | 427    | 439    | 0.860592 | + | TGAGACCATTGAA  |
| CPXV-BR_forward_1-224499  | 480    | 492    | 0.860592 | + | TGAGACCATTGAA  |

|                          |       |       |          |   |               |
|--------------------------|-------|-------|----------|---|---------------|
| CPXV-BR_forward_1-224499 | 551   | 563   | 0.860592 | + | TGAGACCATTGAA |
| CPXV-BR_forward_1-224499 | 604   | 616   | 0.860592 | + | TGAGACCATTGAA |
| CPXV-BR_forward_1-224499 | 657   | 669   | 0.860592 | + | TGAGACCATTGAA |
| CPXV-BR_forward_1-224499 | 728   | 740   | 0.860592 | + | TGAGACCATTGAA |
| CPXV-BR_forward_1-224499 | 781   | 793   | 0.860592 | + | TGAGACCATTGAA |
| CPXV-BR_forward_1-224499 | 834   | 846   | 0.860592 | + | TGAGACCATTGAA |
| CPXV-BR_forward_1-224499 | 905   | 917   | 0.860592 | + | TGAGACCATTGAA |
| CPXV-BR_forward_1-224499 | 958   | 970   | 0.860592 | + | TGAGACCATTGAA |
| CPXV-BR_forward_1-224499 | 1011  | 1023  | 0.860592 | + | TGAGACCATTGAA |
| CPXV-BR_forward_1-224499 | 1082  | 1094  | 0.860592 | + | TGAGACCATTGAA |
| CPXV-BR_forward_1-224499 | 1188  | 1200  | 0.860592 | + | TGAGACCATTGAA |
| CPXV-BR_forward_1-224499 | 1259  | 1271  | 0.860592 | + | TGAGACCATTGAA |
| CPXV-BR_forward_1-224499 | 1312  | 1324  | 0.860592 | + | TGAGACCATTGAA |
| CPXV-BR_forward_1-224499 | 1365  | 1377  | 0.860592 | + | TGAGACCATTGAA |
| CPXV-BR_forward_1-224499 | 1435  | 1447  | 0.860592 | + | TGAGACCATTGAA |
| CPXV-BR_forward_1-224499 | 1488  | 1500  | 0.860592 | + | TGAGACCATTGAA |
| CPXV-BR_forward_1-224499 | 1558  | 1570  | 0.860592 | + | TGAGACCATTGAA |
| CPXV-BR_forward_1-224499 | 1628  | 1640  | 0.860592 | + | TGAGACCATTGAA |
| CPXV-BR_forward_1-224499 | 1666  | 1678  | 0.860592 | + | TGAGACCATTGAA |
| CPXV-BR_forward_1-224499 | 2065  | 2077  | 0.860592 | + | TGAGACCATTGAA |
| CPXV-BR_forward_1-224499 | 2119  | 2131  | 0.860592 | + | TGAGACCATTGAA |
| CPXV-BR_forward_1-224499 | 2190  | 2202  | 0.860592 | + | TGAGACCATTGAA |
| CPXV-BR_forward_1-224499 | 2244  | 2256  | 0.860592 | + | TGAGACCATTGAA |
| CPXV-BR_forward_1-224499 | 2315  | 2327  | 0.860592 | + | TGAGACCATTGAA |
| CPXV-BR_forward_1-224499 | 2369  | 2381  | 0.860592 | + | TGAGACCATTGAA |
| CPXV-BR_forward_1-224499 | 2423  | 2435  | 0.860592 | + | TGAGACCATTGAA |
| CPXV-BR_forward_1-224499 | 2477  | 2489  | 0.860592 | + | TGAGACCATTGAA |
| CPXV-BR_forward_1-224499 | 5657  | 5669  | 0.868214 | + | TGGTGCCTTCTT  |
| CPXV-BR_forward_1-224499 | 8138  | 8150  | 0.88679  | + | TTACATCCTTGGA |
| CPXV-BR_forward_1-224499 | 8554  | 8566  | 0.851643 | + | GTTAATCCTTCGT |
| CPXV-BR_forward_1-224499 | 9417  | 9429  | 0.909021 | + | GGGAGTCCTTAGT |
| CPXV-BR_forward_1-224499 | 12170 | 12182 | 0.898006 | + | TTAATCCCTTAGA |
| CPXV-BR_forward_1-224499 | 12389 | 12401 | 0.866871 | + | TATAATCCTTGAC |
| CPXV-BR_forward_1-224499 | 16633 | 16645 | 0.857485 | + | AGATACCATTGGT |
| CPXV-BR_forward_1-224499 | 17131 | 17143 | 0.894759 | - | TGCTATCCTTGGG |
| CPXV-BR_forward_1-224499 | 21926 | 21938 | 0.908096 | - | TGTAATCCTTGAT |
| CPXV-BR_forward_1-224499 | 22510 | 22522 | 0.8543   | + | TATCGTCCTTATT |
| CPXV-BR_forward_1-224499 | 23514 | 23526 | 0.897697 | + | CGACTCCCTTGTC |
| CPXV-BR_forward_1-224499 | 24915 | 24927 | 0.855157 | + | TAATATCCTTGTC |
| CPXV-BR_forward_1-224499 | 25025 | 25037 | 0.89274  | - | GGGTACCCTTAAC |
| CPXV-BR_forward_1-224499 | 26843 | 26855 | 0.863233 | - | TGAAACCGTTCGT |
| CPXV-BR_forward_1-224499 | 41535 | 41547 | 0.885742 | + | TGAGTTCCTTGTT |
| CPXV-BR_forward_1-224499 | 46661 | 46673 | 0.854834 | - | TGGTCTCCTTCGC |
| CPXV-BR_forward_1-224499 | 47190 | 47202 | 0.880799 | + | CCAAACCCTTGTT |
| CPXV-BR_forward_1-224499 | 47713 | 47725 | 0.863156 | + | CCAAACCCTTGAG |
| CPXV-BR_forward_1-224499 | 49911 | 49923 | 0.855576 | - | AGAAACCGTTAGA |
| CPXV-BR_forward_1-224499 | 51294 | 51306 | 0.850306 | + | ATACTCCCTTGTA |
| CPXV-BR_forward_1-224499 | 52655 | 52667 | 0.856553 | - | TTAAGTCCTTAAA |
| CPXV-BR_forward_1-224499 | 53670 | 53682 | 0.879645 | - | TTTTTCCCTTAGC |
| CPXV-BR_forward_1-224499 | 54605 | 54617 | 0.861115 | + | TGATAACCTTGGC |
| CPXV-BR_forward_1-224499 | 56350 | 56362 | 0.912579 | - | TGAAATCCTTGTT |
| CPXV-BR_forward_1-224499 | 56359 | 56371 | 0.887901 | - | TGGCATCCTTGAA |
| CPXV-BR_forward_1-224499 | 59811 | 59823 | 0.861098 | + | TGTAACCCATGTA |
| CPXV-BR_forward_1-224499 | 63023 | 63035 | 0.878959 | + | TGGCTTCCTTAGT |
| CPXV-BR_forward_1-224499 | 65515 | 65527 | 0.864926 | - | AGAATTCCTTCGC |
| CPXV-BR_forward_1-224499 | 65541 | 65553 | 0.875482 | + | TAGTACCCTTAAT |
| CPXV-BR_forward_1-224499 | 66190 | 66202 | 0.868442 | - | AGGTATCCTTGTT |
| CPXV-BR_forward_1-224499 | 67306 | 67318 | 0.854173 | - | ATACATCCTTAGT |

|                          |        |        |          |   |                |
|--------------------------|--------|--------|----------|---|----------------|
| CPXV-BR_forward_1-224499 | 67468  | 67480  | 0.852681 | - | CGGTTTCCTTGTA  |
| CPXV-BR_forward_1-224499 | 68398  | 68410  | 0.860948 | - | TGTATTCCTAAC   |
| CPXV-BR_forward_1-224499 | 68435  | 68447  | 0.852046 | + | CGGATCCCATGGT  |
| CPXV-BR_forward_1-224499 | 68581  | 68593  | 0.879515 | - | AGTCTCCCTTATA  |
| CPXV-BR_forward_1-224499 | 69222  | 69234  | 0.881086 | - | TGTCACCCATGGA  |
| CPXV-BR_forward_1-224499 | 71323  | 71335  | 0.86392  | + | TGCAACTCTTAGC  |
| CPXV-BR_forward_1-224499 | 71869  | 71881  | 0.884559 | + | GTGGACCCTTGAT  |
| CPXV-BR_forward_1-224499 | 72043  | 72055  | 0.857009 | + | TATAATCCTTATA  |
| CPXV-BR_forward_1-224499 | 72454  | 72466  | 0.853009 | + | CTACTCCCTTG TG |
| CPXV-BR_forward_1-224499 | 74349  | 74361  | 0.865859 | + | TGACAACCTTGGC  |
| CPXV-BR_forward_1-224499 | 76915  | 76927  | 0.850674 | + | TATTATCCTTGAC  |
| CPXV-BR_forward_1-224499 | 77303  | 77315  | 0.867965 | - | AGGAATCCTTATC  |
| CPXV-BR_forward_1-224499 | 78190  | 78202  | 0.852677 | + | TGCGTTCCTTG TG |
| CPXV-BR_forward_1-224499 | 79149  | 79161  | 0.879605 | + | TGATGCCGTTGGC  |
| CPXV-BR_forward_1-224499 | 80821  | 80833  | 0.872425 | + | TATATTCCTTGGA  |
| CPXV-BR_forward_1-224499 | 81769  | 81781  | 0.851371 | - | TAAAACCGTTGGT  |
| CPXV-BR_forward_1-224499 | 86224  | 86236  | 0.867733 | + | CGTATTCCTTCGG  |
| CPXV-BR_forward_1-224499 | 86509  | 86521  | 0.851704 | - | TAATATCCTTGAC  |
| CPXV-BR_forward_1-224499 | 88174  | 88186  | 0.863431 | - | TGTATTCCTTGAG  |
| CPXV-BR_forward_1-224499 | 88531  | 88543  | 0.878986 | - | ATAAATCCTTGGA  |
| CPXV-BR_forward_1-224499 | 89093  | 89105  | 0.871914 | - | TTCTGTCCCTGGT  |
| CPXV-BR_forward_1-224499 | 96138  | 96150  | 0.864609 | + | TGAAGCCATTGAA  |
| CPXV-BR_forward_1-224499 | 96269  | 96281  | 0.850988 | - | GATGATCCTTGAC  |
| CPXV-BR_forward_1-224499 | 98381  | 98393  | 0.852992 | + | CGTGACTCTTG TG |
| CPXV-BR_forward_1-224499 | 98610  | 98622  | 0.858522 | - | AAAAGTCCTTGAT  |
| CPXV-BR_forward_1-224499 | 102224 | 102236 | 0.875294 | - | CTGGATCCTTAGA  |
| CPXV-BR_forward_1-224499 | 103379 | 103391 | 0.87468  | - | TCTTGCCCTTGTT  |
| CPXV-BR_forward_1-224499 | 104380 | 104392 | 0.918297 | + | GGTTACCCTTGTC  |
| CPXV-BR_forward_1-224499 | 105845 | 105857 | 0.868006 | + | CATAATCCTTGTA  |
| CPXV-BR_forward_1-224499 | 106270 | 106282 | 0.852714 | - | CGATGCCATT CGA |
| CPXV-BR_forward_1-224499 | 106566 | 106578 | 0.858244 | + | TGGAGCCATTGTC  |
| CPXV-BR_forward_1-224499 | 106624 | 106636 | 0.858239 | + | GGAAGCTCTTCGC  |
| CPXV-BR_forward_1-224499 | 109883 | 109895 | 0.893243 | - | GGAGATCCTTGAT  |
| CPXV-BR_forward_1-224499 | 113164 | 113176 | 0.850407 | - | TCTAACCCCTCAC  |
| CPXV-BR_forward_1-224499 | 114190 | 114202 | 0.883156 | - | CGGTATCCTTGTA  |
| CPXV-BR_forward_1-224499 | 114970 | 114982 | 0.87568  | - | ATAAACCCCTTGAG |
| CPXV-BR_forward_1-224499 | 116099 | 116111 | 0.886872 | + | AAGAACCCTTGAT  |
| CPXV-BR_forward_1-224499 | 119901 | 119913 | 0.86912  | + | TTATTCCTTCGA   |
| CPXV-BR_forward_1-224499 | 120648 | 120660 | 0.882487 | - | TGAAGCCGTTAGA  |
| CPXV-BR_forward_1-224499 | 122368 | 122380 | 0.860015 | - | GGAAAACCTTGGT  |
| CPXV-BR_forward_1-224499 | 123716 | 123728 | 0.859005 | + | TACAATCCTTCGT  |
| CPXV-BR_forward_1-224499 | 123761 | 123773 | 0.888047 | - | GAAGATCCTTGGA  |
| CPXV-BR_forward_1-224499 | 125002 | 125014 | 0.8697   | + | CTTACCCCTTGAT  |
| CPXV-BR_forward_1-224499 | 125333 | 125345 | 0.903689 | + | CGATTCCTTGAT   |
| CPXV-BR_forward_1-224499 | 125892 | 125904 | 0.885543 | + | TGTCGCCGTTGGT  |
| CPXV-BR_forward_1-224499 | 126038 | 126050 | 0.871484 | - | CGTGACTCTTCGT  |
| CPXV-BR_forward_1-224499 | 126780 | 126792 | 0.854903 | - | TGTTACCTT AGT  |
| CPXV-BR_forward_1-224499 | 126812 | 126824 | 0.8871   | - | CGTAGCTCTTAGA  |
| CPXV-BR_forward_1-224499 | 126886 | 126898 | 0.879943 | + | CACCACCCTTGAA  |
| CPXV-BR_forward_1-224499 | 127580 | 127592 | 0.886242 | - | CGGAACTCTTGGA  |
| CPXV-BR_forward_1-224499 | 128746 | 128758 | 0.868476 | + | AAATATCCTTGGA  |
| CPXV-BR_forward_1-224499 | 130172 | 130184 | 0.884124 | + | TGAGATCCTTAAG  |
| CPXV-BR_forward_1-224499 | 130179 | 130191 | 0.858306 | - | TATGTCCCTTAAG  |
| CPXV-BR_forward_1-224499 | 132516 | 132528 | 0.862553 | - | CGTACCATTAGT   |
| CPXV-BR_forward_1-224499 | 133384 | 133396 | 0.925763 | - | TGTATCCCTTGTT  |
| CPXV-BR_forward_1-224499 | 133891 | 133903 | 0.871855 | + | TATCTCCCTTGAT  |
| CPXV-BR_forward_1-224499 | 134409 | 134421 | 0.886406 | - | TTAATCCCTTCGT  |
| CPXV-BR_forward_1-224499 | 134479 | 134491 | 0.850846 | + | TATCGTCCTTAAT  |

|                          |        |        |          |   |                |
|--------------------------|--------|--------|----------|---|----------------|
| CPXV-BR_forward_1-224499 | 134905 | 134917 | 0.873544 | - | CATCATCCTTAGA  |
| CPXV-BR_forward_1-224499 | 135925 | 135937 | 0.878233 | + | TGGCGCCATTGGC  |
| CPXV-BR_forward_1-224499 | 137003 | 137015 | 0.862985 | + | AGTTACTCTTGGT  |
| CPXV-BR_forward_1-224499 | 139966 | 139978 | 0.98659  | + | TGGAGCCCTTGGA  |
| CPXV-BR_forward_1-224499 | 143170 | 143182 | 0.871336 | - | AAAATCCCTTAGG  |
| CPXV-BR_forward_1-224499 | 144136 | 144148 | 0.868075 | - | TTAGATCCTTGAT  |
| CPXV-BR_forward_1-224499 | 145347 | 145359 | 0.898566 | - | TTTTACCCTTCGA  |
| CPXV-BR_forward_1-224499 | 146416 | 146428 | 0.870419 | - | AGTTATCCTTGAC  |
| CPXV-BR_forward_1-224499 | 147509 | 147521 | 0.860352 | - | TAGAATCCTTGAA  |
| CPXV-BR_forward_1-224499 | 147539 | 147551 | 0.85689  | - | CCTTGTCTTGGGA  |
| CPXV-BR_forward_1-224499 | 147545 | 147557 | 0.853185 | - | TTTCATCCTTGTC  |
| CPXV-BR_forward_1-224499 | 150850 | 150862 | 0.855172 | - | TTTCTCCCTTATT  |
| CPXV-BR_forward_1-224499 | 151450 | 151462 | 0.851229 | + | AGACCTCCTTCGT  |
| CPXV-BR_forward_1-224499 | 153634 | 153646 | 0.856323 | + | CGCATTCTTGGAT  |
| CPXV-BR_forward_1-224499 | 154481 | 154493 | 0.853927 | - | CGCTATCCTTAAC  |
| CPXV-BR_forward_1-224499 | 158609 | 158621 | 0.909271 | - | AATGGCCCTTGTT  |
| CPXV-BR_forward_1-224499 | 158633 | 158645 | 0.867891 | + | TTAAATCCTTGTT  |
| CPXV-BR_forward_1-224499 | 159594 | 159606 | 0.892107 | + | TGACGTCTTATC   |
| CPXV-BR_forward_1-224499 | 161708 | 161720 | 0.879814 | - | TTTTACCCTTATA  |
| CPXV-BR_forward_1-224499 | 163208 | 163220 | 0.868532 | - | TAGGACCCTTGCT  |
| CPXV-BR_forward_1-224499 | 163858 | 163870 | 0.869095 | - | TATAATCCTTGAT  |
| CPXV-BR_forward_1-224499 | 164832 | 164844 | 0.854048 | - | CGATACCCCTTAGC |
| CPXV-BR_forward_1-224499 | 165760 | 165772 | 0.867532 | - | GATGGTCTTTCGA  |
| CPXV-BR_forward_1-224499 | 169020 | 169032 | 0.868075 | + | CTAGATCCTTGTT  |
| CPXV-BR_forward_1-224499 | 169038 | 169050 | 0.878749 | - | TGAAACCATTGGG  |
| CPXV-BR_forward_1-224499 | 171316 | 171328 | 0.859378 | - | TAAAACCTTGGGA  |
| CPXV-BR_forward_1-224499 | 171737 | 171749 | 0.852689 | + | TCTTATCCTTGGGA |
| CPXV-BR_forward_1-224499 | 172870 | 172882 | 0.860293 | - | GGTTATCCTTATA  |
| CPXV-BR_forward_1-224499 | 174506 | 174518 | 0.907533 | - | TGGGATCCTTGTT  |
| CPXV-BR_forward_1-224499 | 178973 | 178985 | 0.860956 | + | TCTAGTCCTTAGC  |
| CPXV-BR_forward_1-224499 | 179472 | 179484 | 0.857051 | - | TGGGCTCCTTATA  |
| CPXV-BR_forward_1-224499 | 179538 | 179550 | 0.882105 | - | TTTTATCCTTGGT  |
| CPXV-BR_forward_1-224499 | 184677 | 184689 | 0.85059  | + | TGACGCCGTTGAA  |
| CPXV-BR_forward_1-224499 | 185188 | 185200 | 0.854731 | + | AGACATCCTTCTT  |
| CPXV-BR_forward_1-224499 | 187479 | 187491 | 0.872018 | + | AAACACCCTTATA  |
| CPXV-BR_forward_1-224499 | 187859 | 187871 | 0.867769 | + | TATATCCCTTAAA  |
| CPXV-BR_forward_1-224499 | 188308 | 188320 | 0.896682 | - | AGAAACCCTTCTG  |
| CPXV-BR_forward_1-224499 | 188415 | 188427 | 0.853776 | - | TTTTGTCTTGGAA  |
| CPXV-BR_forward_1-224499 | 188620 | 188632 | 0.873233 | + | TGAGGTCCTGGT   |
| CPXV-BR_forward_1-224499 | 191360 | 191372 | 0.872214 | + | TGGAATCCTTCAA  |
| CPXV-BR_forward_1-224499 | 195664 | 195676 | 0.913378 | + | TAACGCCCTTGTA  |
| CPXV-BR_forward_1-224499 | 196670 | 196682 | 0.890469 | - | CGATTCCCTTATC  |
| CPXV-BR_forward_1-224499 | 201832 | 201844 | 0.872316 | - | CGGCATCCTTATC  |
| CPXV-BR_forward_1-224499 | 203728 | 203740 | 0.897873 | - | TGTCATCCTTGTC  |
| CPXV-BR_forward_1-224499 | 204541 | 204553 | 0.859021 | - | TGTAGACCTTCGT  |
| CPXV-BR_forward_1-224499 | 206802 | 206814 | 0.864314 | - | CTAATTCCTTGGGA |
| CPXV-BR_forward_1-224499 | 207989 | 208001 | 0.859586 | + | TGTATCCCCTAGA  |
| CPXV-BR_forward_1-224499 | 208718 | 208730 | 0.924675 | - | AGCCACCCTTAGT  |
| CPXV-BR_forward_1-224499 | 209152 | 209164 | 0.858792 | - | TATGCCCTTCTT   |
| CPXV-BR_forward_1-224499 | 209362 | 209374 | 0.867797 | - | TTAAACCCTTCAG  |
| CPXV-BR_forward_1-224499 | 209510 | 209522 | 0.852574 | - | AGCTATCCTTGAC  |
| CPXV-BR_forward_1-224499 | 211018 | 211030 | 0.85279  | + | TAATCTCCTTGGGA |
| CPXV-BR_forward_1-224499 | 214665 | 214677 | 0.888397 | + | CGTTCTCCTTGGT  |
| CPXV-BR_forward_1-224499 | 215071 | 215083 | 0.909021 | - | GGGAGTCCTTAGT  |
| CPXV-BR_forward_1-224499 | 215934 | 215946 | 0.851643 | - | GTTAATCCTTCGT  |
| CPXV-BR_forward_1-224499 | 216350 | 216362 | 0.88679  | - | TTACATCCTTGGGA |
| CPXV-BR_forward_1-224499 | 218831 | 218843 | 0.868214 | - | TGGTGTCTTCTT   |
| CPXV-BR_forward_1-224499 | 222011 | 222023 | 0.860592 | - | TGAGACCATTGAA  |

|                           |        |        |          |   |                |
|---------------------------|--------|--------|----------|---|----------------|
| CPXV-BR_forward_1-224499  | 222065 | 222077 | 0.860592 | - | TGAGACCATTGAA  |
| CPXV-BR_forward_1-224499  | 222119 | 222131 | 0.860592 | - | TGAGACCATTGAA  |
| CPXV-BR_forward_1-224499  | 222173 | 222185 | 0.860592 | - | TGAGACCATTGAA  |
| CPXV-BR_forward_1-224499  | 222244 | 222256 | 0.860592 | - | TGAGACCATTGAA  |
| CPXV-BR_forward_1-224499  | 222298 | 222310 | 0.860592 | - | TGAGACCATTGAA  |
| CPXV-BR_forward_1-224499  | 222369 | 222381 | 0.860592 | - | TGAGACCATTGAA  |
| CPXV-BR_forward_1-224499  | 222423 | 222435 | 0.860592 | - | TGAGACCATTGAA  |
| CPXV-BR_forward_1-224499  | 222822 | 222834 | 0.860592 | - | TGAGACCATTGAA  |
| CPXV-BR_forward_1-224499  | 222860 | 222872 | 0.860592 | - | TGAGACCATTGAA  |
| CPXV-BR_forward_1-224499  | 222930 | 222942 | 0.860592 | - | TGAGACCATTGAA  |
| CPXV-BR_forward_1-224499  | 223000 | 223012 | 0.860592 | - | TGAGACCATTGAA  |
| CPXV-BR_forward_1-224499  | 223053 | 223065 | 0.860592 | - | TGAGACCATTGAA  |
| CPXV-BR_forward_1-224499  | 223123 | 223135 | 0.860592 | - | TGAGACCATTGAA  |
| CPXV-BR_forward_1-224499  | 223176 | 223188 | 0.860592 | - | TGAGACCATTGAA  |
| CPXV-BR_forward_1-224499  | 223229 | 223241 | 0.860592 | - | TGAGACCATTGAA  |
| CPXV-BR_forward_1-224499  | 223300 | 223312 | 0.860592 | - | TGAGACCATTGAA  |
| CPXV-BR_forward_1-224499  | 223406 | 223418 | 0.860592 | - | TGAGACCATTGAA  |
| CPXV-BR_forward_1-224499  | 223477 | 223489 | 0.860592 | - | TGAGACCATTGAA  |
| CPXV-BR_forward_1-224499  | 223530 | 223542 | 0.860592 | - | TGAGACCATTGAA  |
| CPXV-BR_forward_1-224499  | 223583 | 223595 | 0.860592 | - | TGAGACCATTGAA  |
| CPXV-BR_forward_1-224499  | 223654 | 223666 | 0.860592 | - | TGAGACCATTGAA  |
| CPXV-BR_forward_1-224499  | 223707 | 223719 | 0.860592 | - | TGAGACCATTGAA  |
| CPXV-BR_forward_1-224499  | 223760 | 223772 | 0.860592 | - | TGAGACCATTGAA  |
| CPXV-BR_forward_1-224499  | 223831 | 223843 | 0.860592 | - | TGAGACCATTGAA  |
| CPXV-BR_forward_1-224499  | 223884 | 223896 | 0.860592 | - | TGAGACCATTGAA  |
| CPXV-BR_forward_1-224499  | 223937 | 223949 | 0.860592 | - | TGAGACCATTGAA  |
| CPXV-BR_forward_1-224499  | 224008 | 224020 | 0.860592 | - | TGAGACCATTGAA  |
| CPXV-BR_forward_1-224499  | 224061 | 224073 | 0.860592 | - | TGAGACCATTGAA  |
| CPXV-BR_forward_1-224499  | 224192 | 224204 | 0.860592 | - | TGAGACCATTGAA  |
| CPXV-BR_forward_1-224499  | 224270 | 224282 | 0.860592 | - | TGAGACCATTGAA  |
| CPXV-BR_forward_1-224499  | 224356 | 224368 | 0.85651  | - | TGTAACCCATGAC  |
| ECTV-MOS_forward_1-209771 | 1729   | 1741   | 0.862398 | + | CTAGATCCTTGAC  |
| ECTV-MOS_forward_1-209771 | 3059   | 3071   | 0.880202 | + | TATAGTCCTTGTT  |
| ECTV-MOS_forward_1-209771 | 3508   | 3520   | 0.876897 | + | TGATGTCCTTCTT  |
| ECTV-MOS_forward_1-209771 | 4978   | 4990   | 0.866177 | + | TCTCGTCCTTGGT  |
| ECTV-MOS_forward_1-209771 | 5227   | 5239   | 0.888397 | - | CGTTCTCCTTGGT  |
| ECTV-MOS_forward_1-209771 | 8512   | 8524   | 0.877504 | + | CGTAATCCTTCAT  |
| ECTV-MOS_forward_1-209771 | 8701   | 8713   | 0.859658 | + | CGAATTCCTTAAA  |
| ECTV-MOS_forward_1-209771 | 8787   | 8799   | 0.85279  | - | TAATCTCCTTGGA  |
| ECTV-MOS_forward_1-209771 | 9822   | 9834   | 0.869305 | + | TTAGATCCTTGTC  |
| ECTV-MOS_forward_1-209771 | 12786  | 12798  | 0.876036 | + | ATATACCCTTGTA  |
| ECTV-MOS_forward_1-209771 | 15571  | 15583  | 0.913634 | - | TGATATCCTTGGG  |
| ECTV-MOS_forward_1-209771 | 17149  | 17161  | 0.857347 | - | CACCACCCTTCTT  |
| ECTV-MOS_forward_1-209771 | 18866  | 18878  | 0.897484 | - | GGGCACCCTTAAC  |
| ECTV-MOS_forward_1-209771 | 20628  | 20640  | 0.850639 | - | TAAAGTCCTTCAT  |
| ECTV-MOS_forward_1-209771 | 20670  | 20682  | 0.863233 | - | TGAAACCCTTTCGT |
| ECTV-MOS_forward_1-209771 | 23563  | 23575  | 0.865927 | - | TGTTGCCCTAGTA  |
| ECTV-MOS_forward_1-209771 | 23921  | 23933  | 0.857501 | - | TGATACCGTTAGC  |
| ECTV-MOS_forward_1-209771 | 24720  | 24732  | 0.873145 | - | TGGTGCCGTTGGT  |
| ECTV-MOS_forward_1-209771 | 25826  | 25838  | 0.859563 | + | TAAATCCCTTCTA  |
| ECTV-MOS_forward_1-209771 | 33125  | 33137  | 0.885742 | + | TGAGTTCCTTGTT  |
| ECTV-MOS_forward_1-209771 | 38140  | 38152  | 0.854834 | - | TGGTCTCCTTCGC  |
| ECTV-MOS_forward_1-209771 | 41511  | 41523  | 0.863907 | + | ACAAACCCTTGTA  |
| ECTV-MOS_forward_1-209771 | 44749  | 44761  | 0.856553 | - | TTAAGTCCTTAAA  |
| ECTV-MOS_forward_1-209771 | 45764  | 45776  | 0.879645 | - | TTTTTCCCTTAGC  |
| ECTV-MOS_forward_1-209771 | 48460  | 48472  | 0.91149  | - | TGAAATCCTTGTA  |
| ECTV-MOS_forward_1-209771 | 48469  | 48481  | 0.887901 | - | TGGCATCCTTGAA  |
| ECTV-MOS_forward_1-209771 | 51898  | 51910  | 0.861098 | + | TGTAACCCATGTA  |

|                           |        |        |          |   |                |
|---------------------------|--------|--------|----------|---|----------------|
| ECTV-MOS_forward_1-209771 | 55109  | 55121  | 0.878959 | + | TGGCTTCCTTAGT  |
| ECTV-MOS_forward_1-209771 | 57578  | 57590  | 0.86606  | - | AGAATTCCTTCGA  |
| ECTV-MOS_forward_1-209771 | 57604  | 57616  | 0.875482 | + | TAGTACCCTTAAT  |
| ECTV-MOS_forward_1-209771 | 59364  | 59376  | 0.854173 | - | ATACATCCTTAGT  |
| ECTV-MOS_forward_1-209771 | 59526  | 59538  | 0.852681 | - | CGGTTTCCTTGTA  |
| ECTV-MOS_forward_1-209771 | 60456  | 60468  | 0.860948 | - | TGTATTCCTTAAC  |
| ECTV-MOS_forward_1-209771 | 60493  | 60505  | 0.852046 | + | CGGATCCCATGGT  |
| ECTV-MOS_forward_1-209771 | 61316  | 61328  | 0.882176 | - | TGTCACCCATGGT  |
| ECTV-MOS_forward_1-209771 | 63407  | 63419  | 0.86392  | + | TGCAACTCCTGAC  |
| ECTV-MOS_forward_1-209771 | 63953  | 63965  | 0.890246 | + | GAGGACCCTTGAT  |
| ECTV-MOS_forward_1-209771 | 64127  | 64139  | 0.857009 | + | TATAATCCTTATA  |
| ECTV-MOS_forward_1-209771 | 66433  | 66445  | 0.865859 | + | TGACAACCTTGGC  |
| ECTV-MOS_forward_1-209771 | 68951  | 68963  | 0.855214 | + | AGTAAACCCTAGTA |
| ECTV-MOS_forward_1-209771 | 68995  | 69007  | 0.850674 | + | TATTATCCTTGAC  |
| ECTV-MOS_forward_1-209771 | 69383  | 69395  | 0.870189 | - | AGGAATCCTTATT  |
| ECTV-MOS_forward_1-209771 | 70270  | 70282  | 0.852677 | + | TGCGTTCCTTG TG |
| ECTV-MOS_forward_1-209771 | 71392  | 71404  | 0.8567   | + | TATGGTCCTTCTT  |
| ECTV-MOS_forward_1-209771 | 72904  | 72916  | 0.872425 | + | TATATTCCTTGGA  |
| ECTV-MOS_forward_1-209771 | 73465  | 73477  | 0.856551 | + | AGATGCCCTTCCA  |
| ECTV-MOS_forward_1-209771 | 75139  | 75151  | 0.853403 | - | TAAACTCCTTAGC  |
| ECTV-MOS_forward_1-209771 | 78305  | 78317  | 0.867733 | + | CGTATTCCTTCGG  |
| ECTV-MOS_forward_1-209771 | 78590  | 78602  | 0.851704 | - | TAATATCCTTGAC  |
| ECTV-MOS_forward_1-209771 | 80255  | 80267  | 0.863431 | - | TGTATTCCTTGAG  |
| ECTV-MOS_forward_1-209771 | 80612  | 80624  | 0.878986 | - | ATAAATCCTTGGA  |
| ECTV-MOS_forward_1-209771 | 88198  | 88210  | 0.864609 | + | TGAAGCCATTGAA  |
| ECTV-MOS_forward_1-209771 | 88329  | 88341  | 0.850988 | - | GATGATCCTTGAC  |
| ECTV-MOS_forward_1-209771 | 89334  | 89346  | 0.853055 | - | AATATCCCTTATT  |
| ECTV-MOS_forward_1-209771 | 90667  | 90679  | 0.858522 | - | AAAAGTCCTTGAT  |
| ECTV-MOS_forward_1-209771 | 92279  | 92291  | 0.856349 | - | CATAGCCCTTAGT  |
| ECTV-MOS_forward_1-209771 | 94284  | 94296  | 0.875294 | - | CTGGATCCTTAGA  |
| ECTV-MOS_forward_1-209771 | 95439  | 95451  | 0.903006 | - | TTTTGCCCTTGTT  |
| ECTV-MOS_forward_1-209771 | 97906  | 97918  | 0.868006 | + | CATAATCCTTGTA  |
| ECTV-MOS_forward_1-209771 | 98328  | 98340  | 0.852714 | - | CGATGCCATT CGA |
| ECTV-MOS_forward_1-209771 | 98624  | 98636  | 0.858244 | + | TGGAGCCATTGTC  |
| ECTV-MOS_forward_1-209771 | 98682  | 98694  | 0.858239 | + | GGAAGCTCTTCGC  |
| ECTV-MOS_forward_1-209771 | 101956 | 101968 | 0.893243 | - | GGAGATCCTTGAT  |
| ECTV-MOS_forward_1-209771 | 102477 | 102489 | 0.87241  | + | TCTGACCCTTATT  |
| ECTV-MOS_forward_1-209771 | 106258 | 106270 | 0.883156 | - | CGGTATCCTTGTA  |
| ECTV-MOS_forward_1-209771 | 107038 | 107050 | 0.87568  | - | ATAAACCTTGAG   |
| ECTV-MOS_forward_1-209771 | 111969 | 111981 | 0.86912  | + | TTATTCCTTCGA   |
| ECTV-MOS_forward_1-209771 | 112716 | 112728 | 0.882487 | - | TGAAGCCGTTAGA  |
| ECTV-MOS_forward_1-209771 | 115786 | 115798 | 0.859005 | + | TACAATCCTTCGT  |
| ECTV-MOS_forward_1-209771 | 115831 | 115843 | 0.888047 | - | GAAGATCCTTGGA  |
| ECTV-MOS_forward_1-209771 | 117072 | 117084 | 0.8697   | + | CTTACCCCTTGAT  |
| ECTV-MOS_forward_1-209771 | 117962 | 117974 | 0.885543 | + | TGTCGCCGTTGGT  |
| ECTV-MOS_forward_1-209771 | 118108 | 118120 | 0.871484 | - | CGTACTCCTTCGT  |
| ECTV-MOS_forward_1-209771 | 118850 | 118862 | 0.862557 | - | TGTTGCCTTAGT   |
| ECTV-MOS_forward_1-209771 | 118882 | 118894 | 0.8871   | - | CGTAGCTCTTAGA  |
| ECTV-MOS_forward_1-209771 | 119650 | 119662 | 0.886242 | - | CGGAACTCTTGGA  |
| ECTV-MOS_forward_1-209771 | 120816 | 120828 | 0.868476 | + | AAATATCCTTGGA  |
| ECTV-MOS_forward_1-209771 | 122242 | 122254 | 0.884124 | + | TGAGATCCTTAAG  |
| ECTV-MOS_forward_1-209771 | 122249 | 122261 | 0.858306 | - | TATGTCCCTTAAG  |
| ECTV-MOS_forward_1-209771 | 122381 | 122393 | 0.888253 | + | TGTAACCGTTGGA  |
| ECTV-MOS_forward_1-209771 | 124544 | 124556 | 0.862553 | - | CGTACCACTTAGT  |
| ECTV-MOS_forward_1-209771 | 125412 | 125424 | 0.925763 | - | TGTATCCCTTGTT  |
| ECTV-MOS_forward_1-209771 | 125919 | 125931 | 0.857406 | + | TATCTCCCTTAAT  |
| ECTV-MOS_forward_1-209771 | 126437 | 126449 | 0.886406 | - | TTAATCCCTTCGT  |
| ECTV-MOS_forward_1-209771 | 126507 | 126519 | 0.850846 | + | TATCGTCCTTAAT  |



|                           |        |        |          |   |                 |
|---------------------------|--------|--------|----------|---|-----------------|
| ECTV-MOS_forward_1-209771 | 126933 | 126945 | 0.873544 | - | CATCATCCTTAGA   |
| ECTV-MOS_forward_1-209771 | 127924 | 127936 | 0.878233 | + | TGGCGCCATTGGC   |
| ECTV-MOS_forward_1-209771 | 129002 | 129014 | 0.862985 | + | AGTTACTCTTGGT   |
| ECTV-MOS_forward_1-209771 | 131099 | 131111 | 0.857049 | + | CACCATCCTTGGG   |
| ECTV-MOS_forward_1-209771 | 131303 | 131315 | 0.878116 | + | GGTCTCCCTTATC   |
| ECTV-MOS_forward_1-209771 | 131956 | 131968 | 0.98659  | + | TGGAGCCCTTGGGA  |
| ECTV-MOS_forward_1-209771 | 135152 | 135164 | 0.871336 | - | AAAATCCCTTAGG   |
| ECTV-MOS_forward_1-209771 | 137335 | 137347 | 0.898566 | - | TTTTACCCTTCGA   |
| ECTV-MOS_forward_1-209771 | 138404 | 138416 | 0.870419 | - | AGTTATCCTTGAC   |
| ECTV-MOS_forward_1-209771 | 139497 | 139509 | 0.868006 | - | TAGAGTCCTTGAA   |
| ECTV-MOS_forward_1-209771 | 139527 | 139539 | 0.85689  | - | CCTTGTCCCTTGGGA |
| ECTV-MOS_forward_1-209771 | 139533 | 139545 | 0.853185 | - | TTTCATCCTTGTC   |
| ECTV-MOS_forward_1-209771 | 145410 | 145422 | 0.900299 | + | CATATCCCTTAGT   |
| ECTV-MOS_forward_1-209771 | 145896 | 145908 | 0.856062 | - | TGTGTCTCTTAGA   |
| ECTV-MOS_forward_1-209771 | 150031 | 150043 | 0.909271 | - | AATGGCCCTTGTT   |
| ECTV-MOS_forward_1-209771 | 150055 | 150067 | 0.867891 | + | TTAAATCCTTGTT   |
| ECTV-MOS_forward_1-209771 | 150977 | 150989 | 0.853106 | + | TACGTCCTTATC    |
| ECTV-MOS_forward_1-209771 | 153077 | 153089 | 0.879814 | - | TTTTACCCTTATA   |
| ECTV-MOS_forward_1-209771 | 154563 | 154575 | 0.868532 | - | TAGGACCCTTGCT   |
| ECTV-MOS_forward_1-209771 | 155167 | 155179 | 0.872548 | - | TATAATCCTTGTT   |
| ECTV-MOS_forward_1-209771 | 158277 | 158289 | 0.852051 | + | CGTAGCCATGGA    |
| ECTV-MOS_forward_1-209771 | 160365 | 160377 | 0.864452 | + | TGGAACCCTAGAT   |
| ECTV-MOS_forward_1-209771 | 160372 | 160384 | 0.868075 | + | CTAGATCCTTGTT   |
| ECTV-MOS_forward_1-209771 | 162666 | 162678 | 0.859378 | - | TAAAACCTTGGGA   |
| ECTV-MOS_forward_1-209771 | 163087 | 163099 | 0.852689 | + | TCTTATCCTTGGGA  |
| ECTV-MOS_forward_1-209771 | 164042 | 164054 | 0.861581 | - | CAATGTCCTTGTT   |
| ECTV-MOS_forward_1-209771 | 164216 | 164228 | 0.860293 | - | GGTTATCCTTATA   |
| ECTV-MOS_forward_1-209771 | 165815 | 165827 | 0.898139 | - | TAAAACCCTTAAC   |
| ECTV-MOS_forward_1-209771 | 165855 | 165867 | 0.907533 | - | TGGGATCCTTGTT   |
| ECTV-MOS_forward_1-209771 | 170308 | 170320 | 0.860956 | + | TCTAGTCCTTAGC   |
| ECTV-MOS_forward_1-209771 | 170820 | 170832 | 0.857051 | - | TGGGTCCTTATA    |
| ECTV-MOS_forward_1-209771 | 170886 | 170898 | 0.882105 | - | TTTTATCCTTGGT   |
| ECTV-MOS_forward_1-209771 | 174704 | 174716 | 0.862292 | - | TGATACCATTAGT   |
| ECTV-MOS_forward_1-209771 | 176451 | 176463 | 0.854731 | + | AGACATCCTTCTT   |
| ECTV-MOS_forward_1-209771 | 177908 | 177920 | 0.862836 | + | CGATGCCGTTAGA   |
| ECTV-MOS_forward_1-209771 | 178107 | 178119 | 0.885561 | - | CGTGTTCCCTTCGT  |
| ECTV-MOS_forward_1-209771 | 178790 | 178802 | 0.863334 | + | AAGCACCTTATA    |
| ECTV-MOS_forward_1-209771 | 179173 | 179185 | 0.902663 | + | TATATCCCTTAGA   |
| ECTV-MOS_forward_1-209771 | 179622 | 179634 | 0.904336 | - | AGAAGCCCTTCTG   |
| ECTV-MOS_forward_1-209771 | 181213 | 181225 | 0.872214 | + | TGGAATCCTTCAA   |
| ECTV-MOS_forward_1-209771 | 181541 | 181553 | 0.850532 | - | CGTATCCTTTGGA   |
| ECTV-MOS_forward_1-209771 | 182585 | 182597 | 0.856167 | + | TGATGCCATTCTGA  |
| ECTV-MOS_forward_1-209771 | 185528 | 185540 | 0.905725 | + | TACACCCCTTGTA   |
| ECTV-MOS_forward_1-209771 | 186539 | 186551 | 0.890469 | - | CGATTCCTTATC    |
| ECTV-MOS_forward_1-209771 | 189872 | 189884 | 0.874054 | - | TGCTATCCTTGAT   |
| ECTV-MOS_forward_1-209771 | 191876 | 191888 | 0.852421 | - | TATAATCCTTAAC   |
| ECTV-MOS_forward_1-209771 | 193664 | 193676 | 0.883424 | - | TGTCATCCTTATC   |
| ECTV-MOS_forward_1-209771 | 194480 | 194492 | 0.859021 | - | TGTAGACCTTCGT   |
| ECTV-MOS_forward_1-209771 | 196763 | 196775 | 0.864314 | - | CTAATTCCTTGGGA  |
| ECTV-MOS_forward_1-209771 | 197941 | 197953 | 0.859586 | + | TGTATCCCTTAGA   |
| ECTV-MOS_forward_1-209771 | 199107 | 199119 | 0.86326  | - | TATGTCCCTTCTT   |
| ECTV-MOS_forward_1-209771 | 199317 | 199329 | 0.867797 | - | TTAAACCCTTCTG   |
| ECTV-MOS_forward_1-209771 | 199465 | 199477 | 0.852574 | - | AGCTATCCTTGAC   |
| ECTV-MOS_forward_1-209771 | 200973 | 200985 | 0.85279  | + | TAATTCCTTGGGA   |
| ECTV-MOS_forward_1-209771 | 201059 | 201071 | 0.859658 | - | CGAATTCCTTAAA   |
| ECTV-MOS_forward_1-209771 | 201248 | 201260 | 0.877504 | - | CGTAATCCTTCAT   |
| ECTV-MOS_forward_1-209771 | 204533 | 204545 | 0.888397 | + | CGTTCTCCTTGGT   |
| ECTV-MOS_forward_1-209771 | 204782 | 204794 | 0.866177 | - | TCTCGTCCTTGGT   |

|                           |        |        |          |   |               |
|---------------------------|--------|--------|----------|---|---------------|
| ECTV-MOS_forward_1-209771 | 206252 | 206264 | 0.876897 | - | TGATGTCCTTCTT |
| ECTV-MOS_forward_1-209771 | 206701 | 206713 | 0.880202 | - | TATAGTCCTTGTT |
| ECTV-MOS_forward_1-209771 | 208031 | 208043 | 0.862398 | - | CTAGATCCTTGAC |
| MOCV-SB1_forward_1-190289 | 77     | 89     | 0.851727 | - | TCTCGTCCTTAGT |
| MOCV-SB1_forward_1-190289 | 3575   | 3587   | 0.937008 | - | TGGCTCCCTTGGA |
| MOCV-SB1_forward_1-190289 | 4838   | 4850   | 0.874848 | + | CGCGCTCCTTAGA |
| MOCV-SB1_forward_1-190289 | 5294   | 5306   | 0.860045 | + | TGCCACCGTTGGT |
| MOCV-SB1_forward_1-190289 | 6011   | 6023   | 0.904073 | + | GGAAGCCCTTCTG |
| MOCV-SB1_forward_1-190289 | 6376   | 6388   | 0.883226 | + | TGTGGCCCTGTCT |
| MOCV-SB1_forward_1-190289 | 6813   | 6825   | 0.927059 | - | CGGGGCCCTTCTC |
| MOCV-SB1_forward_1-190289 | 7442   | 7454   | 0.852932 | - | TCTGTCCCTTGAT |
| MOCV-SB1_forward_1-190289 | 8327   | 8339   | 0.905259 | - | CGTTCCTTAGT   |
| MOCV-SB1_forward_1-190289 | 8454   | 8466   | 0.853085 | + | CATGGCTCTGGG  |
| MOCV-SB1_forward_1-190289 | 8911   | 8923   | 0.857014 | + | CGGAGCCATTGTT |
| MOCV-SB1_forward_1-190289 | 10820  | 10832  | 0.900097 | + | TGGCGCCCTTGCT |
| MOCV-SB1_forward_1-190289 | 10857  | 10869  | 0.935495 | + | TGCGGCCCTTGTC |
| MOCV-SB1_forward_1-190289 | 10939  | 10951  | 0.857997 | - | CCGTACCCTTCGC |
| MOCV-SB1_forward_1-190289 | 12230  | 12242  | 0.868774 | - | CTGTATCCTTGGC |
| MOCV-SB1_forward_1-190289 | 12318  | 12330  | 0.85111  | + | ATGGCCCTTGTC  |
| MOCV-SB1_forward_1-190289 | 12781  | 12793  | 0.863072 | + | CATCGTCCTTGTC |
| MOCV-SB1_forward_1-190289 | 12934  | 12946  | 0.854632 | + | CGGAGCCCTGGAC |
| MOCV-SB1_forward_1-190289 | 14387  | 14399  | 0.871048 | - | CGAGCCCTAGGC  |
| MOCV-SB1_forward_1-190289 | 17209  | 17221  | 0.858599 | + | TGTTGCGCTTGGA |
| MOCV-SB1_forward_1-190289 | 17526  | 17538  | 0.967289 | - | CGTGGCCCTTCGA |
| MOCV-SB1_forward_1-190289 | 17701  | 17713  | 0.875324 | - | AGACGCTCTTGGA |
| MOCV-SB1_forward_1-190289 | 18172  | 18184  | 0.850523 | - | AAACGCCCTTGCT |
| MOCV-SB1_forward_1-190289 | 18319  | 18331  | 0.867069 | + | CGTGTTCCTTGTC |
| MOCV-SB1_forward_1-190289 | 19051  | 19063  | 0.873196 | - | ATAAACCCCTAAC |
| MOCV-SB1_forward_1-190289 | 19984  | 19996  | 0.853639 | + | CGCGACTCTTCGT |
| MOCV-SB1_forward_1-190289 | 20265  | 20277  | 0.945908 | - | CGCCGCCCTTAGC |
| MOCV-SB1_forward_1-190289 | 21129  | 21141  | 0.861129 | + | TGAGCCCATGGC  |
| MOCV-SB1_forward_1-190289 | 25132  | 25144  | 0.873282 | - | CGGCTTCCTTAGC |
| MOCV-SB1_forward_1-190289 | 25242  | 25254  | 0.860928 | + | CGGGGCCCTCGGG |
| MOCV-SB1_forward_1-190289 | 25434  | 25446  | 0.906056 | + | CGCGGCTCTGGG  |
| MOCV-SB1_forward_1-190289 | 26062  | 26074  | 0.856268 | - | CGGGGCCCTTCTT |
| MOCV-SB1_forward_1-190289 | 26364  | 26376  | 0.872958 | - | TGGCGCCCTTCTT |
| MOCV-SB1_forward_1-190289 | 26895  | 26907  | 0.963753 | + | CGTCGCCCTTAGC |
| MOCV-SB1_forward_1-190289 | 27962  | 27974  | 0.860329 | - | CGTCACCATTAGC |
| MOCV-SB1_forward_1-190289 | 29448  | 29460  | 0.858765 | - | CGAGAGCCTTCGT |
| MOCV-SB1_forward_1-190289 | 30219  | 30231  | 0.85546  | + | AGGGATCCTCAC  |
| MOCV-SB1_forward_1-190289 | 30333  | 30345  | 0.896493 | + | AGTAGCCTTGAT  |
| MOCV-SB1_forward_1-190289 | 30707  | 30719  | 0.87313  | - | TGCAGCCCTTCCA |
| MOCV-SB1_forward_1-190289 | 34555  | 34567  | 0.890069 | - | AGGAGCCCTTGCC |
| MOCV-SB1_forward_1-190289 | 35373  | 35385  | 0.857008 | + | TGTAGCTCTTGAG |
| MOCV-SB1_forward_1-190289 | 36584  | 36596  | 0.853033 | + | AGAGGCCCTGTG  |
| MOCV-SB1_forward_1-190289 | 39568  | 39580  | 0.874779 | + | CGTCACCATTGGC |
| MOCV-SB1_forward_1-190289 | 39719  | 39731  | 0.87544  | - | CGGAGCCCTTTGA |
| MOCV-SB1_forward_1-190289 | 40259  | 40271  | 0.874813 | + | TGGAAGCCTTGCC |
| MOCV-SB1_forward_1-190289 | 40277  | 40289  | 0.964452 | + | TGCGGCCCTTAGC |
| MOCV-SB1_forward_1-190289 | 40412  | 40424  | 0.862537 | + | CGGTGTCCTTCTC |
| MOCV-SB1_forward_1-190289 | 40898  | 40910  | 0.855581 | + | TGCAGTCCTTGCA |
| MOCV-SB1_forward_1-190289 | 41222  | 41234  | 0.953193 | + | TGTGGTCCTTGGA |
| MOCV-SB1_forward_1-190289 | 42074  | 42086  | 0.850537 | + | TGAATCCCTTTGT |
| MOCV-SB1_forward_1-190289 | 42607  | 42619  | 0.931388 | - | AGTAGCCTTGGT  |
| MOCV-SB1_forward_1-190289 | 44722  | 44734  | 0.857534 | - | ATTGCCCTTGAT  |
| MOCV-SB1_forward_1-190289 | 44893  | 44905  | 0.856901 | - | GAGCGCCCTTCTC |
| MOCV-SB1_forward_1-190289 | 46297  | 46309  | 0.904173 | - | CATGATCCTTGGT |
| MOCV-SB1_forward_1-190289 | 48402  | 48414  | 0.874306 | + | CGGAGCCCTTGC  |

|                           |        |        |          |   |                |
|---------------------------|--------|--------|----------|---|----------------|
| MOCV-SB1_forward_1-190289 | 51659  | 51671  | 0.920965 | - | AGACGTCCTTGGT  |
| MOCV-SB1_forward_1-190289 | 52163  | 52175  | 0.85739  | - | TGAAGGCCTTGAA  |
| MOCV-SB1_forward_1-190289 | 53672  | 53684  | 0.929841 | + | GGCCGCCCTTAGC  |
| MOCV-SB1_forward_1-190289 | 54801  | 54813  | 0.8654   | - | TGGAGCCCATCGA  |
| MOCV-SB1_forward_1-190289 | 55084  | 55096  | 0.895353 | + | TGGTGCCCTTGCT  |
| MOCV-SB1_forward_1-190289 | 55950  | 55962  | 0.851984 | - | AGAAACTCTTCGA  |
| MOCV-SB1_forward_1-190289 | 56263  | 56275  | 0.857385 | + | CGTCGTCCTTGCC  |
| MOCV-SB1_forward_1-190289 | 58115  | 58127  | 0.861883 | + | GACCGCCCTTGTCG |
| MOCV-SB1_forward_1-190289 | 58581  | 58593  | 0.875683 | + | CGGGTTCCTTCGC  |
| MOCV-SB1_forward_1-190289 | 61262  | 61274  | 0.902404 | + | AGGCATCCTTGGC  |
| MOCV-SB1_forward_1-190289 | 63496  | 63508  | 0.86056  | - | TGGTACCCTTCCT  |
| MOCV-SB1_forward_1-190289 | 64346  | 64358  | 0.854874 | + | CATTGTCCTTGAC  |
| MOCV-SB1_forward_1-190289 | 64595  | 64607  | 0.897329 | + | TGTTGTCCTTGAC  |
| MOCV-SB1_forward_1-190289 | 66008  | 66020  | 0.884966 | + | TGAAGACCTTGGC  |
| MOCV-SB1_forward_1-190289 | 66037  | 66049  | 0.850649 | - | TGTCGCCGTTGAT  |
| MOCV-SB1_forward_1-190289 | 66487  | 66499  | 0.960645 | + | GGATGCCCTTGGT  |
| MOCV-SB1_forward_1-190289 | 66634  | 66646  | 0.872958 | - | TGGCGTCCTTCTT  |
| MOCV-SB1_forward_1-190289 | 66685  | 66697  | 0.870141 | + | GCGGGCCCTTAGG  |
| MOCV-SB1_forward_1-190289 | 66959  | 66971  | 0.858599 | + | TGTTGCGCTTGGA  |
| MOCV-SB1_forward_1-190289 | 67004  | 67016  | 0.85727  | + | AGCCCTCCTTGGC  |
| MOCV-SB1_forward_1-190289 | 67520  | 67532  | 0.855576 | - | GAGGGCCCTTGCA  |
| MOCV-SB1_forward_1-190289 | 73530  | 73542  | 0.875122 | + | CGTTGCCGTTGCG  |
| MOCV-SB1_forward_1-190289 | 73887  | 73899  | 0.860552 | - | CATTGTCCTTGTT  |
| MOCV-SB1_forward_1-190289 | 74066  | 74078  | 0.932224 | - | TGTTGTCCTTGGC  |
| MOCV-SB1_forward_1-190289 | 74151  | 74163  | 0.859609 | + | CTTCGTCCTTGTT  |
| MOCV-SB1_forward_1-190289 | 74771  | 74783  | 0.87235  | + | CGGGCTCCTTCGA  |
| MOCV-SB1_forward_1-190289 | 78092  | 78104  | 0.852544 | + | GGTACTCCTTGAA  |
| MOCV-SB1_forward_1-190289 | 78100  | 78112  | 0.863671 | - | TTGTGCCCTTCAA  |
| MOCV-SB1_forward_1-190289 | 81597  | 81609  | 0.882628 | + | CAGGACCCTTCTT  |
| MOCV-SB1_forward_1-190289 | 85134  | 85146  | 0.881087 | - | GGACGCCCTTGGC  |
| MOCV-SB1_forward_1-190289 | 85166  | 85178  | 0.872713 | + | TGGGGCTCTTCGC  |
| MOCV-SB1_forward_1-190289 | 85981  | 85993  | 0.948221 | - | CGAAGTCCTTGGT  |
| MOCV-SB1_forward_1-190289 | 86979  | 86991  | 0.853522 | + | CGAAGTCCTGGGC  |
| MOCV-SB1_forward_1-190289 | 89188  | 89200  | 0.904571 | - | TTCAGCCCTTCGA  |
| MOCV-SB1_forward_1-190289 | 90266  | 90278  | 0.862909 | + | CGAGGCGCTTGGG  |
| MOCV-SB1_forward_1-190289 | 90630  | 90642  | 0.871996 | + | TGCAGTCCTTCTC  |
| MOCV-SB1_forward_1-190289 | 90642  | 90654  | 0.912148 | + | CGCCGCCCTTAAA  |
| MOCV-SB1_forward_1-190289 | 90766  | 90778  | 0.896403 | - | AGCTGCCCTTGTCG |
| MOCV-SB1_forward_1-190289 | 90911  | 90923  | 0.866367 | - | CGGCACCCCTAGC  |
| MOCV-SB1_forward_1-190289 | 91246  | 91258  | 0.948125 | + | TGCAGCCCTTCGC  |
| MOCV-SB1_forward_1-190289 | 92399  | 92411  | 0.869092 | - | AGAAGCCCTGAGA  |
| MOCV-SB1_forward_1-190289 | 93117  | 93129  | 0.879484 | - | TGCTGTCCTTGAC  |
| MOCV-SB1_forward_1-190289 | 93579  | 93591  | 0.943546 | - | AGTAGCCCTTGTA  |
| MOCV-SB1_forward_1-190289 | 93648  | 93660  | 0.870007 | - | TGGTCTCCTTGGG  |
| MOCV-SB1_forward_1-190289 | 95313  | 95325  | 0.856424 | - | CGTAGCCGTTGAC  |
| MOCV-SB1_forward_1-190289 | 95521  | 95533  | 0.90545  | + | TGGCACCCCTCAA  |
| MOCV-SB1_forward_1-190289 | 96297  | 96309  | 0.87468  | - | TCTTGCCCTTGTT  |
| MOCV-SB1_forward_1-190289 | 96492  | 96504  | 0.885378 | - | GGAAGCTCTTGGC  |
| MOCV-SB1_forward_1-190289 | 98283  | 98295  | 0.867472 | - | TGACGGCCTTAGT  |
| MOCV-SB1_forward_1-190289 | 98715  | 98727  | 0.881062 | + | GGATGTCCTTGAT  |
| MOCV-SB1_forward_1-190289 | 99093  | 99105  | 0.874983 | + | GTTGTCCTTGGT   |
| MOCV-SB1_forward_1-190289 | 100937 | 100949 | 0.859878 | + | TGTAGCCGTTGAC  |
| MOCV-SB1_forward_1-190289 | 101059 | 101071 | 0.860727 | - | AGAAGCTCTTCGT  |
| MOCV-SB1_forward_1-190289 | 101981 | 101993 | 0.868597 | + | CGCTGCTCTTGGT  |
| MOCV-SB1_forward_1-190289 | 102446 | 102458 | 0.89623  | + | GGTAGTCCTTGAT  |
| MOCV-SB1_forward_1-190289 | 102634 | 102646 | 0.85519  | - | AGATCCCCTTCAA  |
| MOCV-SB1_forward_1-190289 | 103109 | 103121 | 0.89694  | + | CGGACTCCTTGGT  |
| MOCV-SB1_forward_1-190289 | 104680 | 104692 | 0.853985 | - | GTAGGTCCTTGAC  |

|                           |        |        |          |   |               |
|---------------------------|--------|--------|----------|---|---------------|
| MOCV-SB1_forward_1-190289 | 105489 | 105501 | 0.936968 | - | TGTCGTCCTTGGC |
| MOCV-SB1_forward_1-190289 | 105618 | 105630 | 0.887037 | + | GGACGTCCTTGTC |
| MOCV-SB1_forward_1-190289 | 107607 | 107619 | 0.943177 | - | GGAAGCCCTTGTC |
| MOCV-SB1_forward_1-190289 | 107619 | 107631 | 0.891434 | - | CGAACTCCTTGGG |
| MOCV-SB1_forward_1-190289 | 107982 | 107994 | 0.858224 | - | CGCGGCGCTTGGT |
| MOCV-SB1_forward_1-190289 | 110837 | 110849 | 0.906277 | - | CGTGGCTCTTGGT |
| MOCV-SB1_forward_1-190289 | 111086 | 111098 | 0.871072 | - | CGAAGCCCTGCGC |
| MOCV-SB1_forward_1-190289 | 111120 | 111132 | 0.864438 | - | TTAAATCCTTGAT |
| MOCV-SB1_forward_1-190289 | 111342 | 111354 | 0.88412  | + | CGTGGACCTTGGC |
| MOCV-SB1_forward_1-190289 | 112435 | 112447 | 0.949451 | - | TGAAATCCTTGGC |
| MOCV-SB1_forward_1-190289 | 112753 | 112765 | 0.957652 | - | TGGGGCCCTTGTC |
| MOCV-SB1_forward_1-190289 | 114597 | 114609 | 0.859793 | - | AGAGCTCCTTGTC |
| MOCV-SB1_forward_1-190289 | 115189 | 115201 | 0.933063 | + | TGCTGCCCTTCGA |
| MOCV-SB1_forward_1-190289 | 115233 | 115245 | 0.884197 | - | TGGTCTCCTTGGT |
| MOCV-SB1_forward_1-190289 | 115263 | 115275 | 0.867136 | - | AGATGTCCTTGAG |
| MOCV-SB1_forward_1-190289 | 115528 | 115540 | 0.908359 | + | TGGTGCCCTTCAA |
| MOCV-SB1_forward_1-190289 | 115817 | 115829 | 0.895967 | + | CTGACCCTTCGC  |
| MOCV-SB1_forward_1-190289 | 116602 | 116614 | 0.854059 | - | CGGGGCCCTGCGG |
| MOCV-SB1_forward_1-190289 | 117131 | 117143 | 0.867281 | + | CGGCGTCCTTCTC |
| MOCV-SB1_forward_1-190289 | 117313 | 117325 | 0.854763 | - | TGGACTCCTTGTC |
| MOCV-SB1_forward_1-190289 | 117337 | 117349 | 0.859171 | - | GGATGTCCTTGGG |
| MOCV-SB1_forward_1-190289 | 117961 | 117973 | 0.867136 | - | AGATGTCCTTGAG |
| MOCV-SB1_forward_1-190289 | 118414 | 118426 | 0.950533 | + | CGCGGCCCTTCGT |
| MOCV-SB1_forward_1-190289 | 119455 | 119467 | 0.854152 | - | GGGCGCCCTCGGT |
| MOCV-SB1_forward_1-190289 | 119815 | 119827 | 0.85263  | - | TCGAGCCCTTCAT |
| MOCV-SB1_forward_1-190289 | 120653 | 120665 | 0.927122 | + | CGCAGTCCTTGGC |
| MOCV-SB1_forward_1-190289 | 120878 | 120890 | 0.88204  | + | GGTAGTCCTTGAG |
| MOCV-SB1_forward_1-190289 | 121105 | 121117 | 0.878729 | + | CGATACTCTTGGA |
| MOCV-SB1_forward_1-190289 | 121348 | 121360 | 0.864065 | + | CGCTGTCCTTGAG |
| MOCV-SB1_forward_1-190289 | 121657 | 121669 | 0.853996 | + | CGTAGGCCTTGAT |
| MOCV-SB1_forward_1-190289 | 122403 | 122415 | 0.859357 | + | CCACGCCCTTGAG |
| MOCV-SB1_forward_1-190289 | 122433 | 122445 | 0.913997 | + | AGATGTCCTTGGC |
| MOCV-SB1_forward_1-190289 | 122783 | 122795 | 0.867482 | - | CGGAGCCCTCGGG |
| MOCV-SB1_forward_1-190289 | 123209 | 123221 | 0.863117 | - | GCTCGCCCTTCGA |
| MOCV-SB1_forward_1-190289 | 123243 | 123255 | 0.857642 | + | TAGCGTCCTTGAT |
| MOCV-SB1_forward_1-190289 | 123347 | 123359 | 0.850954 | - | AGGAGCTCTTCGA |
| MOCV-SB1_forward_1-190289 | 123453 | 123465 | 0.863669 | + | CCACACCCTTGAC |
| MOCV-SB1_forward_1-190289 | 124671 | 124683 | 0.892065 | + | TGTAGTCCTTCTT |
| MOCV-SB1_forward_1-190289 | 124866 | 124878 | 0.866008 | + | TGGAGCGCTTGGC |
| MOCV-SB1_forward_1-190289 | 125413 | 125425 | 0.866151 | - | TGCTGCCCATGGA |
| MOCV-SB1_forward_1-190289 | 125660 | 125672 | 0.926992 | + | AGTAGCCCTTGAG |
| MOCV-SB1_forward_1-190289 | 125905 | 125917 | 0.850709 | - | AGAGGCCCATGAA |
| MOCV-SB1_forward_1-190289 | 127659 | 127671 | 0.883904 | - | CGGGCTCCTTAGC |
| MOCV-SB1_forward_1-190289 | 128083 | 128095 | 0.923174 | - | GGAATCCCTTAGA |
| MOCV-SB1_forward_1-190289 | 131341 | 131353 | 0.864816 | + | CGCAGCCCTTCGT |
| MOCV-SB1_forward_1-190289 | 131873 | 131885 | 0.862818 | + | TGTGGTTCTTGGC |
| MOCV-SB1_forward_1-190289 | 132020 | 132032 | 0.948986 | + | TGTCGCCCTTGAT |
| MOCV-SB1_forward_1-190289 | 132626 | 132638 | 0.926728 | + | GGTAGCCCTTGAG |
| MOCV-SB1_forward_1-190289 | 133321 | 133333 | 0.859609 | - | CGTCGTCCTTGCT |
| MOCV-SB1_forward_1-190289 | 134304 | 134316 | 0.883085 | - | CGGGGCCCTCGGG |
| MOCV-SB1_forward_1-190289 | 134321 | 134333 | 0.852641 | - | CGTTGTCCTTGCC |
| MOCV-SB1_forward_1-190289 | 134839 | 134851 | 0.875666 | + | TGGCGCCGTTGGC |
| MOCV-SB1_forward_1-190289 | 135172 | 135184 | 0.85739  | + | CGAAGGCCTTGTA |
| MOCV-SB1_forward_1-190289 | 135997 | 136009 | 0.880568 | + | GGAAGCCCATGGC |
| MOCV-SB1_forward_1-190289 | 136027 | 136039 | 0.85739  | + | CGAAGGCCTTGTA |
| MOCV-SB1_forward_1-190289 | 136738 | 136750 | 0.857612 | + | GGTGGCCCTGCGC |
| MOCV-SB1_forward_1-190289 | 136778 | 136790 | 0.89544  | - | CTACGCCCTTCGG |
| MOCV-SB1_forward_1-190289 | 136978 | 136990 | 0.876619 | + | CCAGTTCCTTGGC |

|                           |        |        |          |   |                |
|---------------------------|--------|--------|----------|---|----------------|
| MOCV-SB1_forward_1-190289 | 139319 | 139331 | 0.854984 | - | CGCAAACCTTGGC  |
| MOCV-SB1_forward_1-190289 | 140187 | 140199 | 0.867179 | - | ACGAGCCCTTCGA  |
| MOCV-SB1_forward_1-190289 | 141215 | 141227 | 0.873846 | - | CGTGGCGCTTGGC  |
| MOCV-SB1_forward_1-190289 | 141235 | 141247 | 0.922579 | + | CTACGCCCTTGGG  |
| MOCV-SB1_forward_1-190289 | 141981 | 141993 | 0.899578 | - | TGTCGCCCTTGGC  |
| MOCV-SB1_forward_1-190289 | 143436 | 143448 | 0.872713 | + | TGGGGCTCTTCGC  |
| MOCV-SB1_forward_1-190289 | 144534 | 144546 | 0.899489 | - | CGGGCTCCTTGGG  |
| MOCV-SB1_forward_1-190289 | 144703 | 144715 | 0.959451 | + | TGGAGCCCTTCGA  |
| MOCV-SB1_forward_1-190289 | 147287 | 147299 | 0.850302 | + | CGCGGCCCTTGGT  |
| MOCV-SB1_forward_1-190289 | 147421 | 147433 | 0.899353 | - | TGGAATCCTTGAA  |
| MOCV-SB1_forward_1-190289 | 147451 | 147463 | 0.885217 | - | CTTTGTCTTGGG   |
| MOCV-SB1_forward_1-190289 | 147754 | 147766 | 0.870137 | - | TCTTGCCCTTGAA  |
| MOCV-SB1_forward_1-190289 | 148154 | 148166 | 0.85348  | + | TGCTGTCTTCAA   |
| MOCV-SB1_forward_1-190289 | 148246 | 148258 | 0.867773 | - | CCTTGCCCTTGGT  |
| MOCV-SB1_forward_1-190289 | 148252 | 148264 | 0.913526 | - | CGTAGCCCTTGCC  |
| MOCV-SB1_forward_1-190289 | 148294 | 148306 | 0.865095 | - | TGACCTCCTTGTA  |
| MOCV-SB1_forward_1-190289 | 148963 | 148975 | 0.850061 | - | AAAGCCCCTTGAG  |
| MOCV-SB1_forward_1-190289 | 149698 | 149710 | 0.917164 | - | TGTGGTCCTTGAC  |
| MOCV-SB1_forward_1-190289 | 150235 | 150247 | 0.947635 | - | TGATGCCCTTGTA  |
| MOCV-SB1_forward_1-190289 | 150604 | 150616 | 0.858946 | - | TGCGTCTCTTGGT  |
| MOCV-SB1_forward_1-190289 | 151015 | 151027 | 0.861282 | - | TGGGGCCCATGAA  |
| MOCV-SB1_forward_1-190289 | 151360 | 151372 | 0.86658  | - | GGAAGCCCTTGGA  |
| MOCV-SB1_forward_1-190289 | 152483 | 152495 | 0.939478 | + | CGAAATCCTTGGA  |
| MOCV-SB1_forward_1-190289 | 154500 | 154512 | 0.893443 | + | GGGGGTCTTGTG   |
| MOCV-SB1_forward_1-190289 | 155197 | 155209 | 0.895803 | - | TGGCACCCCTTCTG |
| MOCV-SB1_forward_1-190289 | 155610 | 155622 | 0.937608 | + | TGTGGTCCTTAGC  |
| MOCV-SB1_forward_1-190289 | 155729 | 155741 | 0.874356 | + | TGAAGCCCTACGG  |
| MOCV-SB1_forward_1-190289 | 156351 | 156363 | 0.8927   | - | GGCATCCCTTCGT  |
| MOCV-SB1_forward_1-190289 | 158044 | 158056 | 0.860647 | - | GGTGGCCTTTAGC  |
| MOCV-SB1_forward_1-190289 | 158061 | 158073 | 0.887472 | + | CGATGCTCTTGGT  |
| MOCV-SB1_forward_1-190289 | 158592 | 158604 | 0.858354 | - | TGGAACGCTTGGC  |
| MOCV-SB1_forward_1-190289 | 160257 | 160269 | 0.952784 | + | TGGAGCCCTTGGT  |
| MOCV-SB1_forward_1-190289 | 161755 | 161767 | 0.887179 | + | TGGTGCCTTGGC   |
| MOCV-SB1_forward_1-190289 | 162099 | 162111 | 0.966835 | + | CGATACCCTTGGC  |
| MOCV-SB1_forward_1-190289 | 162537 | 162549 | 0.859806 | + | CGCCATCCTTAAA  |
| MOCV-SB1_forward_1-190289 | 163074 | 163086 | 0.87802  | + | TGTGCTCCTTGTG  |
| MOCV-SB1_forward_1-190289 | 163148 | 163160 | 0.891334 | + | CGAGGGCCTTGGC  |
| MOCV-SB1_forward_1-190289 | 164817 | 164829 | 0.874669 | + | TTGGCCCTTTCGC  |
| MOCV-SB1_forward_1-190289 | 166612 | 166624 | 0.908742 | - | AAAAGCCCTTTCGC |
| MOCV-SB1_forward_1-190289 | 167259 | 167271 | 0.88277  | - | AGAGATCCTTGTG  |
| MOCV-SB1_forward_1-190289 | 167389 | 167401 | 0.86003  | + | TGCAGCCCTTCCG  |
| MOCV-SB1_forward_1-190289 | 168151 | 168163 | 0.855817 | + | TGCAGCGCTTGGC  |
| MOCV-SB1_forward_1-190289 | 169424 | 169436 | 0.870699 | + | AGAAACCCCTAGC  |
| MOCV-SB1_forward_1-190289 | 169503 | 169515 | 0.878474 | + | TGCTTTCTTGGT   |
| MOCV-SB1_forward_1-190289 | 170004 | 170016 | 0.957087 | + | CGGAGCCCTTCGT  |
| MOCV-SB1_forward_1-190289 | 170603 | 170615 | 0.852198 | - | CGTAGCCCATGTG  |
| MOCV-SB1_forward_1-190289 | 171282 | 171294 | 0.85559  | + | CGAGGTCCCTGGG  |
| MOCV-SB1_forward_1-190289 | 171885 | 171897 | 0.86024  | - | TGAATCCATTGGC  |
| MOCV-SB1_forward_1-190289 | 174665 | 174677 | 0.860903 | - | TGTAGGCCTTGTG  |
| MOCV-SB1_forward_1-190289 | 175506 | 175518 | 0.890566 | - | GAGCGCCCTTCGT  |
| MOCV-SB1_forward_1-190289 | 177297 | 177309 | 0.889162 | - | CGCAACCCCTTGA  |
| MOCV-SB1_forward_1-190289 | 177570 | 177582 | 0.858294 | - | CGAGGTCTTGGGA  |
| MOCV-SB1_forward_1-190289 | 177832 | 177844 | 0.877661 | - | TGCCCTCCTTGGG  |
| MOCV-SB1_forward_1-190289 | 179075 | 179087 | 0.877015 | + | GGACCTCCTTGGG  |
| MOCV-SB1_forward_1-190289 | 179664 | 179676 | 0.889086 | - | CGGAGCCCATGGA  |
| MOCV-SB1_forward_1-190289 | 180414 | 180426 | 0.863963 | + | TTTGGCCCTTTCGC |
| MOCV-SB1_forward_1-190289 | 180438 | 180450 | 0.863276 | + | CGGACTCCTTGTG  |
| MOCV-SB1_forward_1-190289 | 180560 | 180572 | 0.880065 | - | TTAGTCCCTTGGC  |

|                           |        |        |          |   |                |
|---------------------------|--------|--------|----------|---|----------------|
| MOCV-SB1_forward_1-190289 | 181235 | 181247 | 0.852188 | + | CGACGCCTTTCGT  |
| MOCV-SB1_forward_1-190289 | 181456 | 181468 | 0.888238 | - | AAGGCCCTTGGC   |
| MOCV-SB1_forward_1-190289 | 181977 | 181989 | 0.854341 | + | TGGCGCCCTTGG   |
| MOCV-SB1_forward_1-190289 | 182302 | 182314 | 0.850751 | - | TGGCGCCGTTGCT  |
| MOCV-SB1_forward_1-190289 | 182846 | 182858 | 0.861887 | - | CGAGGCCTTGT    |
| MOCV-SB1_forward_1-190289 | 183701 | 183713 | 0.861762 | + | TGTAGCCTTGT    |
| MOCV-SB1_forward_1-190289 | 183722 | 183734 | 0.850138 | + | CGCCGCCATTAGC  |
| MOCV-SB1_forward_1-190289 | 183759 | 183771 | 0.861184 | - | CGTAATCCTTGCC  |
| MOCV-SB1_forward_1-190289 | 184655 | 184667 | 0.881688 | - | TGGAACCGTTGGT  |
| MOCV-SB1_forward_1-190289 | 184818 | 184830 | 0.919612 | + | GTACGCCCTTGG   |
| MOCV-SB1_forward_1-190289 | 186703 | 186715 | 0.937008 | + | TGGCTCCCTTGG   |
| MOCV-SB1_forward_1-190289 | 190201 | 190213 | 0.851727 | + | TCTCGTCCTTAGT  |
| MPXV-ZRE_forward_1-196858 | 158    | 170    | 0.870067 | + | TGAGACCCATCGA  |
| MPXV-ZRE_forward_1-196858 | 228    | 240    | 0.870067 | + | TGAGACCCATCGA  |
| MPXV-ZRE_forward_1-196858 | 3736   | 3748   | 0.875868 | + | TGTTGTCCTTCT   |
| MPXV-ZRE_forward_1-196858 | 5526   | 5538   | 0.852811 | - | GGGATTCCTTGTA  |
| MPXV-ZRE_forward_1-196858 | 8799   | 8811   | 0.898166 | - | CGGGTCCCTAAC   |
| MPXV-ZRE_forward_1-196858 | 10616  | 10628  | 0.850639 | - | TAAAGTCCTTCAT  |
| MPXV-ZRE_forward_1-196858 | 10658  | 10670  | 0.863233 | - | TGAAACCGTTGCT  |
| MPXV-ZRE_forward_1-196858 | 15662  | 15674  | 0.857501 | - | TGATACCGTTAGC  |
| MPXV-ZRE_forward_1-196858 | 30867  | 30879  | 0.880799 | + | CCAAACCTTGT    |
| MPXV-ZRE_forward_1-196858 | 31309  | 31321  | 0.877346 | + | CCAAACCTTGAT   |
| MPXV-ZRE_forward_1-196858 | 33533  | 33545  | 0.855576 | - | AGAAACCGTTAGA  |
| MPXV-ZRE_forward_1-196858 | 36242  | 36254  | 0.856553 | - | TTAAGTCCTTAAA  |
| MPXV-ZRE_forward_1-196858 | 38192  | 38204  | 0.861115 | + | TGATAACCTTGGC  |
| MPXV-ZRE_forward_1-196858 | 39460  | 39472  | 0.860832 | + | TAAAGCCCTAGT   |
| MPXV-ZRE_forward_1-196858 | 39938  | 39950  | 0.91149  | - | TGAAATCCTTGTA  |
| MPXV-ZRE_forward_1-196858 | 39947  | 39959  | 0.887901 | - | TGGCATCCTTGAA  |
| MPXV-ZRE_forward_1-196858 | 49093  | 49105  | 0.864926 | - | AGAATTCCTTCGC  |
| MPXV-ZRE_forward_1-196858 | 49119  | 49131  | 0.875482 | + | TAGTACCCTTAAT  |
| MPXV-ZRE_forward_1-196858 | 50630  | 50642  | 0.854173 | - | ATACATCCTTAGT  |
| MPXV-ZRE_forward_1-196858 | 50792  | 50804  | 0.852681 | - | CGGTTTCCTTGTA  |
| MPXV-ZRE_forward_1-196858 | 51722  | 51734  | 0.860948 | - | TGTATTCCTTAACT |
| MPXV-ZRE_forward_1-196858 | 51759  | 51771  | 0.852046 | + | CGGATCCCATGGT  |
| MPXV-ZRE_forward_1-196858 | 52586  | 52598  | 0.881086 | - | TGTCACCCATGGA  |
| MPXV-ZRE_forward_1-196858 | 54650  | 54662  | 0.86392  | + | TGCAACTCTTAGC  |
| MPXV-ZRE_forward_1-196858 | 55196  | 55208  | 0.884559 | + | GTGGACCCTTGAT  |
| MPXV-ZRE_forward_1-196858 | 55370  | 55382  | 0.857009 | + | TATAATCCTTATA  |
| MPXV-ZRE_forward_1-196858 | 57676  | 57688  | 0.865859 | + | TGACAACCTTGGC  |
| MPXV-ZRE_forward_1-196858 | 60241  | 60253  | 0.850674 | + | TATTATCCTTGAC  |
| MPXV-ZRE_forward_1-196858 | 60629  | 60641  | 0.867965 | - | AGGAATCCTTATC  |
| MPXV-ZRE_forward_1-196858 | 61516  | 61528  | 0.852677 | + | TGCGTTCCTTGTG  |
| MPXV-ZRE_forward_1-196858 | 63256  | 63268  | 0.863828 | + | CGTCATCCTTCAC  |
| MPXV-ZRE_forward_1-196858 | 65098  | 65110  | 0.851371 | - | TAAAACCGTTGGT  |
| MPXV-ZRE_forward_1-196858 | 66386  | 66398  | 0.853403 | - | TAAACTCCTTAGC  |
| MPXV-ZRE_forward_1-196858 | 69553  | 69565  | 0.867733 | + | CGTATTCCTTCGG  |
| MPXV-ZRE_forward_1-196858 | 69838  | 69850  | 0.851704 | - | TAATATCCTTGAC  |
| MPXV-ZRE_forward_1-196858 | 71503  | 71515  | 0.863431 | - | TGTATTCCTTGAG  |
| MPXV-ZRE_forward_1-196858 | 71860  | 71872  | 0.878986 | - | ATAAATCCTTGGA  |
| MPXV-ZRE_forward_1-196858 | 72422  | 72434  | 0.871914 | - | TTCTGTCCTTGGT  |
| MPXV-ZRE_forward_1-196858 | 79439  | 79451  | 0.864609 | + | TGAAGCCATTGAA  |
| MPXV-ZRE_forward_1-196858 | 79570  | 79582  | 0.850988 | - | GATGATCCTTGAC  |
| MPXV-ZRE_forward_1-196858 | 81910  | 81922  | 0.858522 | - | AAAAGTCCTTGAT  |
| MPXV-ZRE_forward_1-196858 | 85523  | 85535  | 0.875294 | - | CTGGATCCTTAGA  |
| MPXV-ZRE_forward_1-196858 | 86678  | 86690  | 0.87468  | - | TCTTGCCCTTGT   |
| MPXV-ZRE_forward_1-196858 | 89146  | 89158  | 0.868006 | + | CATAATCCTTGTA  |
| MPXV-ZRE_forward_1-196858 | 89864  | 89876  | 0.858244 | + | TGGAGCCATTGTC  |
| MPXV-ZRE_forward_1-196858 | 89922  | 89934  | 0.858239 | + | GGAAGCTCTTCGC  |

|                           |        |        |          |   |                |
|---------------------------|--------|--------|----------|---|----------------|
| MPXV-ZRE_forward_1-196858 | 91033  | 91045  | 0.875419 | + | AGAAATCCTTAAT  |
| MPXV-ZRE_forward_1-196858 | 93201  | 93213  | 0.893243 | - | GGAGATCCTTGAT  |
| MPXV-ZRE_forward_1-196858 | 97500  | 97512  | 0.883156 | - | CGGTATCCTTGTA  |
| MPXV-ZRE_forward_1-196858 | 98280  | 98292  | 0.875568 | - | ATAAACCCCTTGAG |
| MPXV-ZRE_forward_1-196858 | 103210 | 103222 | 0.86912  | + | TTATTCCTTCGA   |
| MPXV-ZRE_forward_1-196858 | 105677 | 105689 | 0.860015 | - | GGAAAACCTTGGT  |
| MPXV-ZRE_forward_1-196858 | 107025 | 107037 | 0.859005 | + | TACAATCCTTCGT  |
| MPXV-ZRE_forward_1-196858 | 107070 | 107082 | 0.888047 | - | GAAGATCCTTGGA  |
| MPXV-ZRE_forward_1-196858 | 108643 | 108655 | 0.859    | + | CTATTCCTTGAT   |
| MPXV-ZRE_forward_1-196858 | 109202 | 109214 | 0.885543 | + | TGTCGCCGTTGGT  |
| MPXV-ZRE_forward_1-196858 | 109348 | 109360 | 0.871484 | - | CGTGACTCTTCGT  |
| MPXV-ZRE_forward_1-196858 | 110123 | 110135 | 0.8871   | - | CGTAGCTCTTAGA  |
| MPXV-ZRE_forward_1-196858 | 110197 | 110209 | 0.879943 | + | CACCACCCTTGAA  |
| MPXV-ZRE_forward_1-196858 | 112060 | 112072 | 0.868476 | + | AAATATCCTTGGA  |
| MPXV-ZRE_forward_1-196858 | 112779 | 112791 | 0.876767 | - | CTCATCCCTTAGT  |
| MPXV-ZRE_forward_1-196858 | 113486 | 113498 | 0.884124 | + | TGAGATCCTTAAG  |
| MPXV-ZRE_forward_1-196858 | 113493 | 113505 | 0.888781 | - | TATGACCCTTAAG  |
| MPXV-ZRE_forward_1-196858 | 113625 | 113637 | 0.888253 | + | TGTAACCGTTGGA  |
| MPXV-ZRE_forward_1-196858 | 115779 | 115791 | 0.862553 | - | CGTCACCATTAGT  |
| MPXV-ZRE_forward_1-196858 | 116647 | 116659 | 0.925763 | - | TGTATCCCTTGTT  |
| MPXV-ZRE_forward_1-196858 | 117154 | 117166 | 0.871855 | + | TATCTCCCTTGAT  |
| MPXV-ZRE_forward_1-196858 | 117742 | 117754 | 0.850846 | + | TATCGCTCTTAAT  |
| MPXV-ZRE_forward_1-196858 | 118168 | 118180 | 0.873544 | - | CATCATCCTTAGA  |
| MPXV-ZRE_forward_1-196858 | 119125 | 119137 | 0.878233 | + | TGGCGCCATTGGC  |
| MPXV-ZRE_forward_1-196858 | 120203 | 120215 | 0.862985 | + | AGTTACTCTTGGT  |
| MPXV-ZRE_forward_1-196858 | 120710 | 120722 | 0.873484 | - | TAAAAACCCTCAG  |
| MPXV-ZRE_forward_1-196858 | 122300 | 122312 | 0.857049 | + | CACCATCCTTGGG  |
| MPXV-ZRE_forward_1-196858 | 122504 | 122516 | 0.873649 | + | GGTCCCCCTTATC  |
| MPXV-ZRE_forward_1-196858 | 123157 | 123169 | 0.858348 | + | TAGAGCTCTTGGA  |
| MPXV-ZRE_forward_1-196858 | 126365 | 126377 | 0.871336 | - | AAAATCCCTTAGG  |
| MPXV-ZRE_forward_1-196858 | 128536 | 128548 | 0.898566 | - | TTTTACCCTTCGA  |
| MPXV-ZRE_forward_1-196858 | 129605 | 129617 | 0.870419 | - | AGTTATCCTTGAC  |
| MPXV-ZRE_forward_1-196858 | 130698 | 130710 | 0.860352 | - | TAGAACTCCTTGAA |
| MPXV-ZRE_forward_1-196858 | 130728 | 130740 | 0.85689  | - | CCTTGTCTTGGGA  |
| MPXV-ZRE_forward_1-196858 | 130734 | 130746 | 0.853185 | - | TTTCATCCTTGTC  |
| MPXV-ZRE_forward_1-196858 | 134039 | 134051 | 0.855172 | - | TTTCTCCCTTATT  |
| MPXV-ZRE_forward_1-196858 | 137048 | 137060 | 0.853927 | - | CGCTATCCTTAAC  |
| MPXV-ZRE_forward_1-196858 | 140229 | 140241 | 0.864201 | + | TGAATTCCTTAAT  |
| MPXV-ZRE_forward_1-196858 | 141152 | 141164 | 0.909271 | - | AATGGCCCTTGTT  |
| MPXV-ZRE_forward_1-196858 | 141176 | 141188 | 0.867891 | + | TTAAATCCTTGTT  |
| MPXV-ZRE_forward_1-196858 | 142146 | 142158 | 0.853106 | + | TACGTCCTTATC   |
| MPXV-ZRE_forward_1-196858 | 144216 | 144228 | 0.879814 | - | TTTTACCCTTATA  |
| MPXV-ZRE_forward_1-196858 | 145723 | 145735 | 0.876186 | - | TAGGGCCCTTGCT  |
| MPXV-ZRE_forward_1-196858 | 147304 | 147316 | 0.854048 | - | CGATACCGTTAGC  |
| MPXV-ZRE_forward_1-196858 | 148323 | 148335 | 0.852051 | + | CGTAGTCCATGGA  |
| MPXV-ZRE_forward_1-196858 | 150432 | 150444 | 0.868075 | + | CTAGATCCTTGTT  |
| MPXV-ZRE_forward_1-196858 | 150450 | 150462 | 0.878749 | - | TGAAACCATTGGG  |
| MPXV-ZRE_forward_1-196858 | 152887 | 152899 | 0.859378 | - | TAAAACCTCTTGGA |
| MPXV-ZRE_forward_1-196858 | 153305 | 153317 | 0.852689 | + | TCTTATCCTTGGA  |
| MPXV-ZRE_forward_1-196858 | 154258 | 154270 | 0.861581 | - | CAATGTCCTTGTT  |
| MPXV-ZRE_forward_1-196858 | 154432 | 154444 | 0.860293 | - | GGTTATCCTTATA  |
| MPXV-ZRE_forward_1-196858 | 156027 | 156039 | 0.894686 | - | CAAAACCCTTAAC  |
| MPXV-ZRE_forward_1-196858 | 156067 | 156079 | 0.907533 | - | TGGGATCCTTGTT  |
| MPXV-ZRE_forward_1-196858 | 158761 | 158773 | 0.857051 | - | TGGGCTCCTTATA  |
| MPXV-ZRE_forward_1-196858 | 158827 | 158839 | 0.882105 | - | TTTTATCCTTGGT  |
| MPXV-ZRE_forward_1-196858 | 159430 | 159442 | 0.909219 | - | CAAAGTCCTTGGT  |
| MPXV-ZRE_forward_1-196858 | 164525 | 164537 | 0.854731 | + | AGACATCCTTCTT  |
| MPXV-ZRE_forward_1-196858 | 166800 | 166812 | 0.85859  | + | AAGTACCCTTATA  |

|                           |        |        |          |   |                |
|---------------------------|--------|--------|----------|---|----------------|
| MPXV-ZRE_forward_1-196858 | 167186 | 167198 | 0.867769 | + | TATATCCCTTAAA  |
| MPXV-ZRE_forward_1-196858 | 167635 | 167647 | 0.896682 | - | AGAAACCCTTCTG  |
| MPXV-ZRE_forward_1-196858 | 167742 | 167754 | 0.853776 | - | TTTTGTCCCTTGAA |
| MPXV-ZRE_forward_1-196858 | 167929 | 167941 | 0.943685 | + | TAACGCCCTTGGC  |
| MPXV-ZRE_forward_1-196858 | 169745 | 169757 | 0.872214 | + | TGGAATCCTTCAA  |
| MPXV-ZRE_forward_1-196858 | 171128 | 171140 | 0.856167 | + | TGATGCCATTCGA  |
| MPXV-ZRE_forward_1-196858 | 176167 | 176179 | 0.874054 | - | TGCTATCCTTGAT  |
| MPXV-ZRE_forward_1-196858 | 179131 | 179143 | 0.872958 | - | TGTCATCCTTCTT  |
| MPXV-ZRE_forward_1-196858 | 182201 | 182213 | 0.864314 | - | CTAATTCCTTGGA  |
| MPXV-ZRE_forward_1-196858 | 184455 | 184467 | 0.86326  | - | TATGTCCCTTCTT  |
| MPXV-ZRE_forward_1-196858 | 186324 | 186336 | 0.85279  | + | TAATCTCCTTGGA  |
| MPXV-ZRE_forward_1-196858 | 188261 | 188273 | 0.882022 | + | CGGTATCCTTGTC  |
| MPXV-ZRE_forward_1-196858 | 188340 | 188352 | 0.894731 | - | GGACTCCCTTGTA  |
| MPXV-ZRE_forward_1-196858 | 188771 | 188783 | 0.866177 | - | TCTCGTCCTTGGT  |
| MPXV-ZRE_forward_1-196858 | 188939 | 188951 | 0.909021 | - | GGGAGTCCTTAGT  |
| MPXV-ZRE_forward_1-196858 | 189030 | 189042 | 0.858906 | - | AGAGGCCCTGCGC  |
| MPXV-ZRE_forward_1-196858 | 191321 | 191333 | 0.852811 | + | GGGATTCCTTGTA  |
| MPXV-ZRE_forward_1-196858 | 193111 | 193123 | 0.875868 | - | TGTTGTCCCTTCTT |
| MPXV-ZRE_forward_1-196858 | 196619 | 196631 | 0.870067 | - | TGAGACCCATCGA  |
| MPXV-ZRE_forward_1-196858 | 196689 | 196701 | 0.870067 | - | TGAGACCCATCGA  |
| PUC19                     | 1030   | 1042   | 0.859734 | + | TTTCTCCCTTCGG  |
| PUC19                     | 1363   | 1375   | 0.851678 | + | GGTAGCTCTTGAT  |
| PUC19                     | 2319   | 2331   | 0.859572 | - | TAAGATCCTTGAG  |
| PUC19                     | 2454   | 2466   | 0.937989 | - | TGTCGCCCTTATT  |
| VACV-WR_forward_1-194711  | 132    | 144    | 0.860147 | + | TGTGACCCATGAC  |
| VACV-WR_forward_1-194711  | 6281   | 6293   | 0.875868 | + | TGTTGTCCCTTCTT |
| VACV-WR_forward_1-194711  | 8622   | 8634   | 0.89274  | - | GGGTACCCTTAAC  |
| VACV-WR_forward_1-194711  | 10426  | 10438  | 0.875922 | - | TGAAACCGTTAGT  |
| VACV-WR_forward_1-194711  | 15405  | 15417  | 0.857501 | - | TGATACCGTTAGC  |
| VACV-WR_forward_1-194711  | 25106  | 25118  | 0.885742 | + | TGAGTTCCCTTGTT |
| VACV-WR_forward_1-194711  | 25640  | 25652  | 0.907342 | + | TGTTTTCCCTTGTC |
| VACV-WR_forward_1-194711  | 30073  | 30085  | 0.854834 | - | TGGTCTCCTTCGC  |
| VACV-WR_forward_1-194711  | 31057  | 31069  | 0.877346 | + | CCAAACCCTTGAT  |
| VACV-WR_forward_1-194711  | 32750  | 32762  | 0.863907 | + | ACAAACCCTTGTA  |
| VACV-WR_forward_1-194711  | 33255  | 33267  | 0.855576 | - | AGAAACCCTTAGA  |
| VACV-WR_forward_1-194711  | 35997  | 36009  | 0.856553 | - | TTAAGTCCTTAAA  |
| VACV-WR_forward_1-194711  | 37929  | 37941  | 0.861115 | + | TGATAACCTTGGC  |
| VACV-WR_forward_1-194711  | 39674  | 39686  | 0.91149  | - | TGAAATCCTTGTA  |
| VACV-WR_forward_1-194711  | 39683  | 39695  | 0.887901 | - | TGGCATCCTTGAA  |
| VACV-WR_forward_1-194711  | 48284  | 48296  | 0.852848 | - | TAAAACCATTGGA  |
| VACV-WR_forward_1-194711  | 48831  | 48843  | 0.864926 | - | AGAATTCCTTCGC  |
| VACV-WR_forward_1-194711  | 48857  | 48869  | 0.875482 | + | TAGTACCCTTAAT  |
| VACV-WR_forward_1-194711  | 50551  | 50563  | 0.854173 | - | ATACATCCTTAGT  |
| VACV-WR_forward_1-194711  | 50713  | 50725  | 0.852681 | - | CGGTTTCCTTGTA  |
| VACV-WR_forward_1-194711  | 51643  | 51655  | 0.860948 | - | TGTATTCCTTAAC  |
| VACV-WR_forward_1-194711  | 51680  | 51692  | 0.852046 | + | CGGATCCCATGGT  |
| VACV-WR_forward_1-194711  | 52507  | 52519  | 0.881086 | - | TGTCACCCATGGA  |
| VACV-WR_forward_1-194711  | 54595  | 54607  | 0.86392  | + | TGCAACTCTTAGC  |
| VACV-WR_forward_1-194711  | 55141  | 55153  | 0.884559 | + | GTGGACCCTTGAT  |
| VACV-WR_forward_1-194711  | 55315  | 55327  | 0.857009 | + | TATAATCCTTATA  |
| VACV-WR_forward_1-194711  | 56475  | 56487  | 0.88402  | - | CGAGGCCGTTGGG  |
| VACV-WR_forward_1-194711  | 57621  | 57633  | 0.865859 | + | TGACAACCTTGGC  |
| VACV-WR_forward_1-194711  | 60189  | 60201  | 0.850674 | + | TATTATCCTTGAC  |
| VACV-WR_forward_1-194711  | 60577  | 60589  | 0.867965 | - | AGGAATCCTTATC  |
| VACV-WR_forward_1-194711  | 61464  | 61476  | 0.852677 | + | TGCGTTCCCTTGTC |
| VACV-WR_forward_1-194711  | 63205  | 63217  | 0.863828 | + | CGTCATCCTTCAC  |
| VACV-WR_forward_1-194711  | 65045  | 65057  | 0.851371 | - | TAAAACCGTTGGT  |
| VACV-WR_forward_1-194711  | 66333  | 66345  | 0.853403 | - | TAAACTCCTTAGC  |



|                          |        |        |          |   |                |
|--------------------------|--------|--------|----------|---|----------------|
| VACV-WR_forward_1-194711 | 69500  | 69512  | 0.867733 | + | CGTATTCCTTCGG  |
| VACV-WR_forward_1-194711 | 69785  | 69797  | 0.851704 | - | TAATATCCTTGAC  |
| VACV-WR_forward_1-194711 | 71450  | 71462  | 0.863431 | - | TGTATTCCTTGAG  |
| VACV-WR_forward_1-194711 | 71807  | 71819  | 0.878986 | - | ATAAATCCTTGGA  |
| VACV-WR_forward_1-194711 | 72369  | 72381  | 0.871914 | - | TTCTGTCCTTGGT  |
| VACV-WR_forward_1-194711 | 79405  | 79417  | 0.864609 | + | TGAAGCCATTGAA  |
| VACV-WR_forward_1-194711 | 79536  | 79548  | 0.850988 | - | GATGATCCTTGAC  |
| VACV-WR_forward_1-194711 | 81875  | 81887  | 0.858522 | - | AAAAGTCCTTGAT  |
| VACV-WR_forward_1-194711 | 85489  | 85501  | 0.875294 | - | CTGGATCCTTAGA  |
| VACV-WR_forward_1-194711 | 87645  | 87657  | 0.918297 | + | GGTTACCCTTGTC  |
| VACV-WR_forward_1-194711 | 89111  | 89123  | 0.868006 | + | CATAATCCTTGTA  |
| VACV-WR_forward_1-194711 | 89829  | 89841  | 0.860468 | + | TGGAGCCATTGTT  |
| VACV-WR_forward_1-194711 | 89887  | 89899  | 0.858239 | + | GGAAGCTCTTCGC  |
| VACV-WR_forward_1-194711 | 93137  | 93149  | 0.893243 | - | GGAGATCCTTGAT  |
| VACV-WR_forward_1-194711 | 97444  | 97456  | 0.883156 | - | CGGTATCCTTGTA  |
| VACV-WR_forward_1-194711 | 98224  | 98236  | 0.87568  | - | ATAAACCCCTTGAG |
| VACV-WR_forward_1-194711 | 99353  | 99365  | 0.886872 | + | AAGAACCCTTGAT  |
| VACV-WR_forward_1-194711 | 103902 | 103914 | 0.882487 | - | TGAAGCCGTTAGA  |
| VACV-WR_forward_1-194711 | 105252 | 105264 | 0.868075 | - | TTAGATCCTTGAT  |
| VACV-WR_forward_1-194711 | 105622 | 105634 | 0.860015 | - | GGAAAACCTTGGT  |
| VACV-WR_forward_1-194711 | 106970 | 106982 | 0.859005 | + | TACAATCCTTCGT  |
| VACV-WR_forward_1-194711 | 107015 | 107027 | 0.888047 | - | GAAGATCCTTGGA  |
| VACV-WR_forward_1-194711 | 108257 | 108269 | 0.8697   | + | CTTACCCCTTGAT  |
| VACV-WR_forward_1-194711 | 108588 | 108600 | 0.859    | + | CTATTCCCTTGAT  |
| VACV-WR_forward_1-194711 | 109147 | 109159 | 0.866287 | + | AGTCGCCGTTGGT  |
| VACV-WR_forward_1-194711 | 109293 | 109305 | 0.871484 | - | CGTGACTCTTCGT  |
| VACV-WR_forward_1-194711 | 110035 | 110047 | 0.862557 | - | TGTTGCCTTGT    |
| VACV-WR_forward_1-194711 | 110067 | 110079 | 0.8871   | - | CGTAGCTCTTAGA  |
| VACV-WR_forward_1-194711 | 110141 | 110153 | 0.879943 | + | CACCACCCTTGAA  |
| VACV-WR_forward_1-194711 | 110835 | 110847 | 0.886242 | - | CGGAACTCTTGGA  |
| VACV-WR_forward_1-194711 | 112001 | 112013 | 0.868476 | + | AAATATCCTTGGA  |
| VACV-WR_forward_1-194711 | 113427 | 113439 | 0.884124 | + | TGAGATCCTTAAG  |
| VACV-WR_forward_1-194711 | 113434 | 113446 | 0.896435 | - | TATGGCCCTTAAG  |
| VACV-WR_forward_1-194711 | 113566 | 113578 | 0.888253 | + | TGTAACCCTTGGA  |
| VACV-WR_forward_1-194711 | 115729 | 115741 | 0.862553 | - | CGTACCATTAGT   |
| VACV-WR_forward_1-194711 | 116597 | 116609 | 0.925763 | - | TGTATCCCTTGTT  |
| VACV-WR_forward_1-194711 | 117104 | 117116 | 0.871855 | + | TATCTCCCTTGAT  |
| VACV-WR_forward_1-194711 | 117622 | 117634 | 0.886406 | - | TTAATCCCTTCGT  |
| VACV-WR_forward_1-194711 | 117692 | 117704 | 0.850846 | + | TATCGTCCTTAAT  |
| VACV-WR_forward_1-194711 | 118118 | 118130 | 0.873544 | - | CATCATCCTTAGA  |
| VACV-WR_forward_1-194711 | 119099 | 119111 | 0.878233 | + | TGGCGCCATTGGC  |
| VACV-WR_forward_1-194711 | 120177 | 120189 | 0.862985 | + | AGTTACTCTTGGT  |
| VACV-WR_forward_1-194711 | 122274 | 122286 | 0.857049 | + | CACCATCCTTGGG  |
| VACV-WR_forward_1-194711 | 122478 | 122490 | 0.878116 | + | GGTCTCCCTTATC  |
| VACV-WR_forward_1-194711 | 123134 | 123146 | 0.98659  | + | TGGAGCCCTTGGA  |
| VACV-WR_forward_1-194711 | 126344 | 126356 | 0.871336 | - | AAAATCCCTTAGG  |
| VACV-WR_forward_1-194711 | 128524 | 128536 | 0.898566 | - | TTTTACCCTTCGA  |
| VACV-WR_forward_1-194711 | 129593 | 129605 | 0.870419 | - | AGTTATCCTTGAC  |
| VACV-WR_forward_1-194711 | 130686 | 130698 | 0.860352 | - | TAGAATCCTTGAA  |
| VACV-WR_forward_1-194711 | 130716 | 130728 | 0.85689  | - | CCTTGTCCCTTGGA |
| VACV-WR_forward_1-194711 | 130722 | 130734 | 0.853185 | - | TTTCATCCTTGTC  |
| VACV-WR_forward_1-194711 | 134027 | 134039 | 0.855172 | - | TTTCTCCCTTATT  |
| VACV-WR_forward_1-194711 | 134483 | 134495 | 0.898616 | - | TAATACCCTTGAT  |
| VACV-WR_forward_1-194711 | 136712 | 136724 | 0.856323 | + | CGCATTCCTTGAT  |
| VACV-WR_forward_1-194711 | 137556 | 137568 | 0.853927 | - | CGCTATCCTTAAC  |
| VACV-WR_forward_1-194711 | 141601 | 141613 | 0.909271 | - | AATGGCCCTTGTT  |
| VACV-WR_forward_1-194711 | 141625 | 141637 | 0.867891 | + | TTAAATCCTTGTT  |
| VACV-WR_forward_1-194711 | 142541 | 142553 | 0.892107 | + | TGACGTCCTTATC  |

|                           |        |        |          |   |                |
|---------------------------|--------|--------|----------|---|----------------|
| VACV-WR_forward_1-194711  | 144642 | 144654 | 0.879814 | - | TTTTACCCTTATA  |
| VACV-WR_forward_1-194711  | 146133 | 146145 | 0.868532 | - | TAGGACCCTTGCT  |
| VACV-WR_forward_1-194711  | 146762 | 146774 | 0.869095 | - | TATAATCCTTGAT  |
| VACV-WR_forward_1-194711  | 147737 | 147749 | 0.854048 | - | CGATACCGTTAGC  |
| VACV-WR_forward_1-194711  | 149847 | 149859 | 0.852051 | + | CGTAGTCCATGGA  |
| VACV-WR_forward_1-194711  | 151913 | 151925 | 0.868075 | + | CTAGATCCTTGTT  |
| VACV-WR_forward_1-194711  | 151931 | 151943 | 0.878749 | - | TGAAACCATTGGG  |
| VACV-WR_forward_1-194711  | 154191 | 154203 | 0.859378 | - | TAAAACCTTTGGA  |
| VACV-WR_forward_1-194711  | 154612 | 154624 | 0.852689 | + | TCTTATCCTTGGA  |
| VACV-WR_forward_1-194711  | 155566 | 155578 | 0.861581 | - | CAATGTCCTTGTT  |
| VACV-WR_forward_1-194711  | 155740 | 155752 | 0.860293 | - | GGTTATCCTTATA  |
| VACV-WR_forward_1-194711  | 157331 | 157343 | 0.894686 | - | CAAAACCCTTAAC  |
| VACV-WR_forward_1-194711  | 157371 | 157383 | 0.907533 | - | TGGGATCCTTGTT  |
| VACV-WR_forward_1-194711  | 161818 | 161830 | 0.860956 | + | TCTAGTCCTTAGC  |
| VACV-WR_forward_1-194711  | 162327 | 162339 | 0.857051 | - | TGGGCTCCTTATA  |
| VACV-WR_forward_1-194711  | 162393 | 162405 | 0.882105 | - | TTTTATCCTTGGT  |
| VACV-WR_forward_1-194711  | 162999 | 163011 | 0.909219 | - | CAAAGTCCTTGGT  |
| VACV-WR_forward_1-194711  | 166308 | 166320 | 0.862292 | - | TGATACCATTAGT  |
| VACV-WR_forward_1-194711  | 169438 | 169450 | 0.862836 | + | CGATGCCGTTAGA  |
| VACV-WR_forward_1-194711  | 170310 | 170322 | 0.85859  | + | AAGTACCCTTATA  |
| VACV-WR_forward_1-194711  | 170696 | 170708 | 0.867769 | + | TATATCCCCTAAA  |
| VACV-WR_forward_1-194711  | 171145 | 171157 | 0.896682 | - | AGAAACCTTCTG   |
| VACV-WR_forward_1-194711  | 171252 | 171264 | 0.853776 | - | TTTTGTCCTTGAA  |
| VACV-WR_forward_1-194711  | 171444 | 171456 | 0.898929 | + | TAACGCCCTTATA  |
| VACV-WR_forward_1-194711  | 172530 | 172542 | 0.872214 | + | TGGAATCCTTCAA  |
| VACV-WR_forward_1-194711  | 173894 | 173906 | 0.860912 | + | TGACGCCATTCGA  |
| VACV-WR_forward_1-194711  | 176773 | 176785 | 0.913378 | + | TAACGCCCTTGTA  |
| VACV-WR_forward_1-194711  | 177774 | 177786 | 0.890469 | - | CGATTCCCTTATC  |
| VACV-WR_forward_1-194711  | 181027 | 181039 | 0.859605 | - | TGCTATCCTTAAT  |
| VACV-WR_forward_1-194711  | 183480 | 183492 | 0.859021 | - | TGTAGACCTTCGT  |
| VACV-WR_forward_1-194711  | 186078 | 186090 | 0.89274  | + | GGGTACCCTTAAC  |
| VACV-WR_forward_1-194711  | 188419 | 188431 | 0.875868 | - | TGTTGTCCTTCTT  |
| VACV-WR_forward_1-194711  | 194568 | 194580 | 0.860147 | - | TGTGACCCATGA   |
| VARV-BSH_forward_1-186103 | 1338   | 1350   | 0.851252 | + | AGAGATCCCTGCGC |
| VARV-BSH_forward_1-186103 | 1429   | 1441   | 0.909021 | + | GGGAGTCCTTAGT  |
| VARV-BSH_forward_1-186103 | 1600   | 1612   | 0.866177 | + | TCTCGTCCTTGGT  |
| VARV-BSH_forward_1-186103 | 2327   | 2339   | 0.853009 | + | CTACTCCCTTG TG |
| VARV-BSH_forward_1-186103 | 3800   | 3812   | 0.89274  | - | GGGTACCCTTAAC  |
| VARV-BSH_forward_1-186103 | 5557   | 5569   | 0.850639 | - | TAAAGTCCTTCAT  |
| VARV-BSH_forward_1-186103 | 5599   | 5611   | 0.8658   | - | TGAAACCATTTCGT |
| VARV-BSH_forward_1-186103 | 14978  | 14990  | 0.874372 | + | TAATATCCTTAGT  |
| VARV-BSH_forward_1-186103 | 18588  | 18600  | 0.885742 | + | TGAGTTCCTTGTT  |
| VARV-BSH_forward_1-186103 | 22517  | 22529  | 0.877346 | + | CCAAACCCTTGAT  |
| VARV-BSH_forward_1-186103 | 23090  | 23102  | 0.858364 | + | ATTATCCCTTGAT  |
| VARV-BSH_forward_1-186103 | 27459  | 27471  | 0.856553 | - | TTAAGTCCTTAAA  |
| VARV-BSH_forward_1-186103 | 29409  | 29421  | 0.861115 | + | TGATAACCTTGGC  |
| VARV-BSH_forward_1-186103 | 31163  | 31175  | 0.896584 | - | TGACATCCTTGAA  |
| VARV-BSH_forward_1-186103 | 35529  | 35541  | 0.858388 | + | TGTCGCCCATGTT  |
| VARV-BSH_forward_1-186103 | 40314  | 40326  | 0.864926 | - | AGAATTCCTTCGC  |
| VARV-BSH_forward_1-186103 | 40340  | 40352  | 0.875482 | + | TAGTACCCTTAAT  |
| VARV-BSH_forward_1-186103 | 42015  | 42027  | 0.854173 | - | ATACATCCTTAGT  |
| VARV-BSH_forward_1-186103 | 43107  | 43119  | 0.860948 | - | TGTATTCCTTAAC  |
| VARV-BSH_forward_1-186103 | 43144  | 43156  | 0.852046 | + | CGGATCCCATGGT  |
| VARV-BSH_forward_1-186103 | 43957  | 43969  | 0.881086 | - | TGTCACCCATGGA  |
| VARV-BSH_forward_1-186103 | 46044  | 46056  | 0.86392  | + | TGCAACTCTTAGC  |
| VARV-BSH_forward_1-186103 | 46590  | 46602  | 0.884559 | + | GTGGACCCTTGAT  |
| VARV-BSH_forward_1-186103 | 46764  | 46776  | 0.857009 | + | TATAATCCTTATA  |
| VARV-BSH_forward_1-186103 | 48604  | 48616  | 0.862434 | + | TAGATCCCTTATC  |

|                           |        |        |          |   |                |
|---------------------------|--------|--------|----------|---|----------------|
| VARV-BSH_forward_1-186103 | 50009  | 50021  | 0.876959 | + | TTAGGTCCTTGTC  |
| VARV-BSH_forward_1-186103 | 50622  | 50634  | 0.875026 | - | CGATATCCTTAAT  |
| VARV-BSH_forward_1-186103 | 51635  | 51647  | 0.850674 | + | TATTATCCTTGAC  |
| VARV-BSH_forward_1-186103 | 52023  | 52035  | 0.867965 | - | AGGAATCCTTATC  |
| VARV-BSH_forward_1-186103 | 52910  | 52922  | 0.852677 | + | TGCGTTCCCTTGTC |
| VARV-BSH_forward_1-186103 | 54651  | 54663  | 0.863828 | + | CGTCATCCTTCAC  |
| VARV-BSH_forward_1-186103 | 55544  | 55556  | 0.872425 | + | TATATTCCTTGGA  |
| VARV-BSH_forward_1-186103 | 57343  | 57355  | 0.870829 | + | TGAAACTCCTTAGG |
| VARV-BSH_forward_1-186103 | 57780  | 57792  | 0.853403 | - | TAAACTCCTTAGC  |
| VARV-BSH_forward_1-186103 | 60947  | 60959  | 0.867733 | + | CGTATTCCTTCGG  |
| VARV-BSH_forward_1-186103 | 61232  | 61244  | 0.851704 | - | TAATATCCTTGAC  |
| VARV-BSH_forward_1-186103 | 62897  | 62909  | 0.863431 | - | TGTATTCCTTGAG  |
| VARV-BSH_forward_1-186103 | 63254  | 63266  | 0.878986 | - | ATAAAATCCTTGGA |
| VARV-BSH_forward_1-186103 | 63816  | 63828  | 0.871914 | - | TTCTGTCCTTGGT  |
| VARV-BSH_forward_1-186103 | 70849  | 70861  | 0.864609 | + | TGAAGCCATTGAA  |
| VARV-BSH_forward_1-186103 | 70980  | 70992  | 0.850988 | - | GATGATCCTTGAC  |
| VARV-BSH_forward_1-186103 | 76922  | 76934  | 0.875294 | - | CTGGATCCTTAGA  |
| VARV-BSH_forward_1-186103 | 78077  | 78089  | 0.87468  | - | TCTTGCCCTTGTT  |
| VARV-BSH_forward_1-186103 | 80544  | 80556  | 0.868006 | + | CATAATCCTTGTA  |
| VARV-BSH_forward_1-186103 | 80610  | 80622  | 0.866737 | + | CGTTGTCCTTCAC  |
| VARV-BSH_forward_1-186103 | 81265  | 81277  | 0.858244 | + | TGGAGCCATTGTC  |
| VARV-BSH_forward_1-186103 | 81323  | 81335  | 0.858239 | + | GGAGCTCCTTCGC  |
| VARV-BSH_forward_1-186103 | 84624  | 84636  | 0.893243 | - | GGAGATCCTTGAT  |
| VARV-BSH_forward_1-186103 | 89711  | 89723  | 0.87568  | - | ATAAACCCCTTGAG |
| VARV-BSH_forward_1-186103 | 90840  | 90852  | 0.872423 | + | AAGAACCCTTAAT  |
| VARV-BSH_forward_1-186103 | 94642  | 94654  | 0.86912  | + | TTATTCCTTCGA   |
| VARV-BSH_forward_1-186103 | 96739  | 96751  | 0.853625 | - | TTAGATCCTTAAT  |
| VARV-BSH_forward_1-186103 | 97109  | 97121  | 0.860015 | - | GGAAAACCTTGGT  |
| VARV-BSH_forward_1-186103 | 98457  | 98469  | 0.859005 | + | TACAATCCTTCGT  |
| VARV-BSH_forward_1-186103 | 98502  | 98514  | 0.888047 | - | GAAGATCCTTGGA  |
| VARV-BSH_forward_1-186103 | 99743  | 99755  | 0.8697   | + | CTTACCCCTTGAT  |
| VARV-BSH_forward_1-186103 | 100074 | 100086 | 0.859    | + | CTATTCCTTGAT   |
| VARV-BSH_forward_1-186103 | 100633 | 100645 | 0.866287 | + | AGTCGCCGTTGGT  |
| VARV-BSH_forward_1-186103 | 100779 | 100791 | 0.853639 | - | CGGGACTCCTTCGT |
| VARV-BSH_forward_1-186103 | 101223 | 101235 | 0.852998 | + | CGGGACTCCTTGTT |
| VARV-BSH_forward_1-186103 | 101521 | 101533 | 0.862557 | - | TGTTGCCCTTGT   |
| VARV-BSH_forward_1-186103 | 101553 | 101565 | 0.8871   | - | CGTAGCTCCTTAGA |
| VARV-BSH_forward_1-186103 | 101627 | 101639 | 0.918944 | + | CGCCACCCTTGAA  |
| VARV-BSH_forward_1-186103 | 103487 | 103499 | 0.868476 | + | AAATATCCTTGGA  |
| VARV-BSH_forward_1-186103 | 104913 | 104925 | 0.884124 | + | TGAGATCCTTAAG  |
| VARV-BSH_forward_1-186103 | 104920 | 104932 | 0.896435 | - | TATGGCCCTTAAG  |
| VARV-BSH_forward_1-186103 | 107185 | 107197 | 0.862553 | - | CGTACCACTTAGT  |
| VARV-BSH_forward_1-186103 | 108053 | 108065 | 0.925763 | - | TGTATCCCTTGTT  |
| VARV-BSH_forward_1-186103 | 108560 | 108572 | 0.871855 | + | TATCTCCCTTGAT  |
| VARV-BSH_forward_1-186103 | 109078 | 109090 | 0.85808  | - | TCAATCCCTTCGT  |
| VARV-BSH_forward_1-186103 | 109148 | 109160 | 0.850846 | + | TATCGTCCTTAAT  |
| VARV-BSH_forward_1-186103 | 109574 | 109586 | 0.873544 | - | CATCATCCTTAGA  |
| VARV-BSH_forward_1-186103 | 110520 | 110532 | 0.878233 | + | TGGCGCCATTGGC  |
| VARV-BSH_forward_1-186103 | 111598 | 111610 | 0.862985 | + | AGTTACTCCTTGGT |
| VARV-BSH_forward_1-186103 | 113701 | 113713 | 0.857049 | + | CACCATCCTTGGG  |
| VARV-BSH_forward_1-186103 | 113905 | 113917 | 0.873649 | + | GGTCCCCCTTATC  |
| VARV-BSH_forward_1-186103 | 114558 | 114570 | 0.858348 | + | TAGAGCTCCTTGGA |
| VARV-BSH_forward_1-186103 | 117756 | 117768 | 0.871336 | - | AAAATCCCTTAGG  |
| VARV-BSH_forward_1-186103 | 119933 | 119945 | 0.898566 | - | TTTTACCCTTCGA  |
| VARV-BSH_forward_1-186103 | 121002 | 121014 | 0.870419 | - | AGTTATCCTTGAC  |
| VARV-BSH_forward_1-186103 | 122095 | 122107 | 0.860352 | - | TAGAATCCTTGAA  |
| VARV-BSH_forward_1-186103 | 122125 | 122137 | 0.85689  | - | CCTTGTCTTGGA   |
| VARV-BSH_forward_1-186103 | 122131 | 122143 | 0.853185 | - | TTTCATCCTTGTC  |

|                           |        |        |          |   |                |
|---------------------------|--------|--------|----------|---|----------------|
| VARV-BSH_forward_1-186103 | 125436 | 125448 | 0.855172 | - | TTTCTCCCTTATT  |
| VARV-BSH_forward_1-186103 | 126036 | 126048 | 0.851229 | + | AGACCTCCTTCGT  |
| VARV-BSH_forward_1-186103 | 127187 | 127199 | 0.855071 | + | CGCAACCATTAGA  |
| VARV-BSH_forward_1-186103 | 128094 | 128106 | 0.856323 | + | CGCATTCCCTTGAT |
| VARV-BSH_forward_1-186103 | 128941 | 128953 | 0.853927 | - | CGCTATCCTTAAC  |
| VARV-BSH_forward_1-186103 | 132981 | 132993 | 0.909271 | - | AATGGCCCTTGTT  |
| VARV-BSH_forward_1-186103 | 133005 | 133017 | 0.867891 | + | TTAAATCCTTGTT  |
| VARV-BSH_forward_1-186103 | 133969 | 133981 | 0.853106 | + | TAACGTCCTTATC  |
| VARV-BSH_forward_1-186103 | 136063 | 136075 | 0.91012  | - | TTTTACCCTTAGC  |
| VARV-BSH_forward_1-186103 | 137541 | 137553 | 0.854082 | - | TAGGACCCTTACT  |
| VARV-BSH_forward_1-186103 | 138118 | 138130 | 0.869095 | - | TATAATCCTTGAT  |
| VARV-BSH_forward_1-186103 | 143267 | 143279 | 0.868075 | + | CTAGATCCTTGTT  |
| VARV-BSH_forward_1-186103 | 143285 | 143297 | 0.878749 | - | TGAAACCATTGGG  |
| VARV-BSH_forward_1-186103 | 145561 | 145573 | 0.859378 | - | TAAAACTCCTGGA  |
| VARV-BSH_forward_1-186103 | 147113 | 147125 | 0.860293 | - | GGTTATCCTTATA  |
| VARV-BSH_forward_1-186103 | 148703 | 148715 | 0.894686 | - | CAAAACCCTTAAC  |
| VARV-BSH_forward_1-186103 | 148743 | 148755 | 0.907533 | - | TGGGATCCTTGTT  |
| VARV-BSH_forward_1-186103 | 150670 | 150682 | 0.860956 | + | TCTAGTCCTTAGC  |
| VARV-BSH_forward_1-186103 | 151182 | 151194 | 0.857051 | - | TGGGCTCCTTATA  |
| VARV-BSH_forward_1-186103 | 151248 | 151260 | 0.882105 | - | TTTTATCCTTGGT  |
| VARV-BSH_forward_1-186103 | 156893 | 156905 | 0.854731 | + | AGACATCCTTCTT  |
| VARV-BSH_forward_1-186103 | 159145 | 159157 | 0.872018 | + | AAACACCCTTATA  |
| VARV-BSH_forward_1-186103 | 159525 | 159537 | 0.867769 | + | TATATCCCTTAAA  |
| VARV-BSH_forward_1-186103 | 159974 | 159986 | 0.851994 | - | AGAAATCCTTCTG  |
| VARV-BSH_forward_1-186103 | 160060 | 160072 | 0.857519 | - | CATCTTCCTTGGA  |
| VARV-BSH_forward_1-186103 | 160081 | 160093 | 0.853776 | - | TTTTGTCCTTGAA  |
| VARV-BSH_forward_1-186103 | 160272 | 160284 | 0.862187 | - | TGTAACCCATGTT  |
| VARV-BSH_forward_1-186103 | 161413 | 161425 | 0.856942 | - | ATGAATCCTTAGT  |
| VARV-BSH_forward_1-186103 | 165322 | 165334 | 0.913378 | + | TAACGCCCTTGTA  |
| VARV-BSH_forward_1-186103 | 166324 | 166336 | 0.890469 | - | CGATTCCCTTATC  |
| VARV-BSH_forward_1-186103 | 169623 | 169635 | 0.874054 | - | TGCTATCCTTGAT  |
| VARV-BSH_forward_1-186103 | 172547 | 172559 | 0.872958 | - | TGTCATCCTTCTT  |
| VARV-BSH_forward_1-186103 | 173360 | 173372 | 0.859021 | - | TGTAGACCTTCGT  |
| VARV-BSH_forward_1-186103 | 177917 | 177929 | 0.86326  | - | TATGTCCCTTCTT  |
| VARV-BSH_forward_1-186103 | 178127 | 178139 | 0.867797 | - | TTAAACCCTTCAG  |
| VARV-BSH_forward_1-186103 | 179783 | 179795 | 0.85279  | + | TAATCTCCTTGGA  |
| VARV-BSH_forward_1-186103 | 181089 | 181101 | 0.880903 | - | TGTTATCCTTATT  |
| VARV-BSH_forward_1-186103 | 181684 | 181696 | 0.868214 | - | TGGTGTCCCTTCTT |
